# Supplementary material for: ALKBH family members as novel biomarkers and prognostic factors in human breast cancer
Source: publisher site journal article supplement (doi:10.18632/aging.204231), 2022-08-17
Supplement: Supplementary file [file aging-v14i16-204231-supplementary-material-SD1.pdf]

SUPPLEMENTARY FIGURE

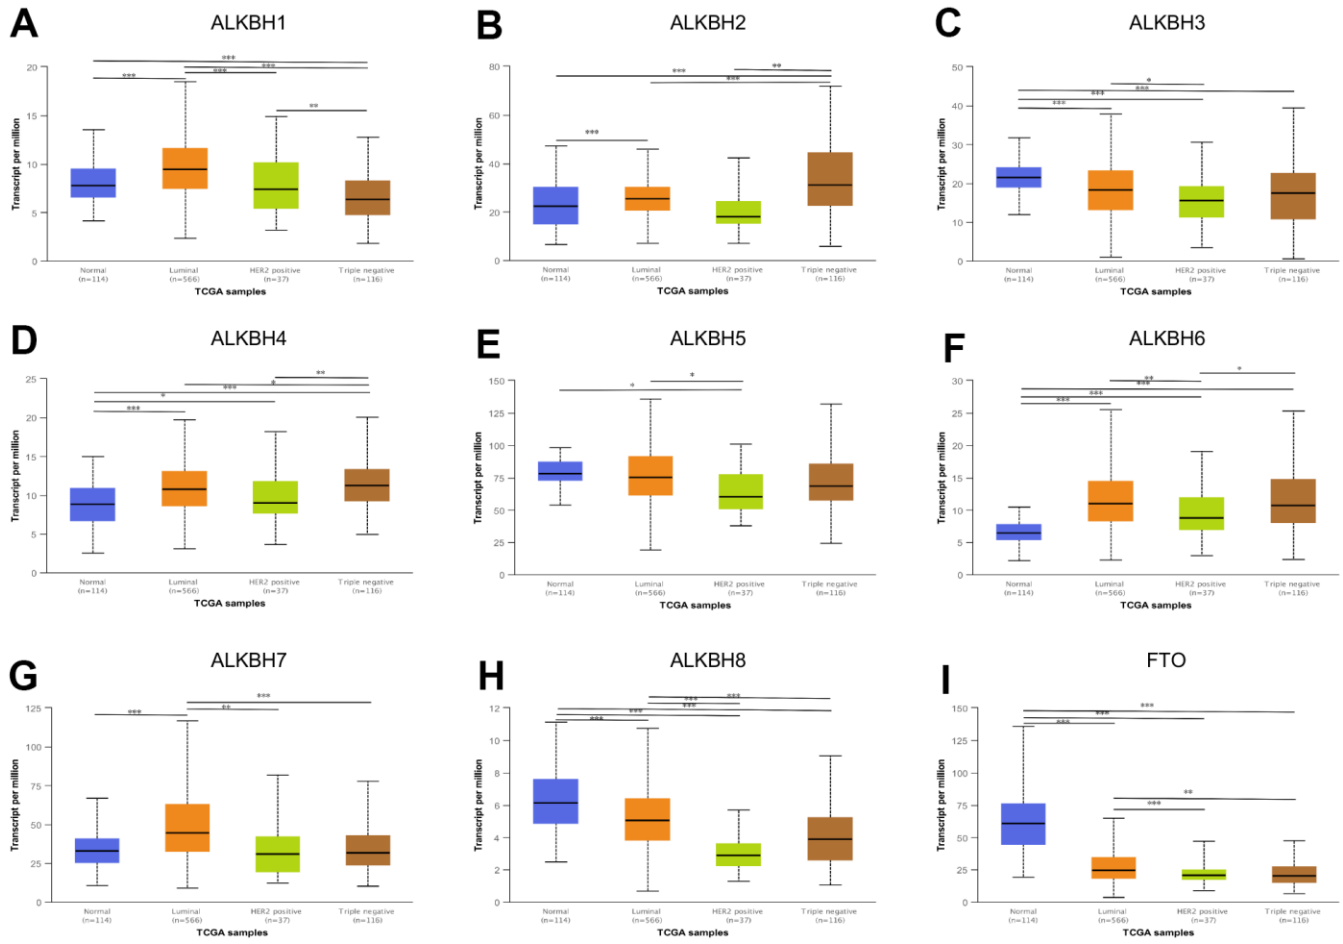

Supplementary Figure 1. The correlation between the ALKBH family and major subclasses of breast cancer. (A–I) The relationship between ALKBH1-8 and FTO mRNA expression levels and major subclasses in BRCA (UALCAN). \*: P<0.05, \*\*: P<0.01, \*\*\*: P<0.001.
