# Supplementary material for: ALKBH family members as novel biomarkers and prognostic factors in human breast cancer
Source: Aging (Albany NY). 2022 Aug 17;14(16):6579–93. doi: 10.18632/aging.204231 (PMC9467415; doi:10.18632/aging.204231)
Supplement: Supplementary Table 1 [file aging-14-204231-s002.xlsx]

## Sheet: 相关性
Supplementary Table 1. The correlations between each ALKBH member in breast cancer.
	ALKBH1	ALKBH2	ALKBH3	ALKBH4	ALKBH5	ALKBH6	ALKBH7	ALKBH8	FTO
ALKBH1	1	-0.095	0.15	0.066	0.23	0.03	-0.029	0.32	0.097
ALKBH2	-0.095	1	0.064	0.37	-0.031	0.16	0.17	-0.052	-0.11
ALKBH3	0.15	0.064	1	0.13	0.094	-0.015	0.17	0.084	0.1
ALKBH4	0.066	0.37	0.13	1	0.087	0.34	0.4	-0.11	-0.046
ALKBH5	0.23	-0.031	0.094	0.087	1	0.087	-0.042	0.27	0.2
ALKBH6	0.03	0.16	-0.015	0.34	0.087	1	0.26	-0.12	-0.0072
ALKBH7	-0.029	0.17	0.17	0.4	-0.042	0.26	1	-0.23	-0.099
ALKBH8	0.32	-0.052	0.084	-0.11	0.27	-0.12	-0.23	1	0.25
FTO	0.097	-0.11	0.1	-0.046	0.2	-0.0072	-0.099	0.25	1

## Sheet: p值
	ALKBH1	ALKBH2	ALKBH3	ALKBH4	ALKBH5	ALKBH6	ALKBH7	ALKBH8	FTO
ALKBH1	0	0.0018	3.7e-07	0.031	2.6e-14	0.32	0.34	0	0.0015
ALKBH2	0.0018	0	0.035	0	0.31	9.8e-08	1.1e-08	0.085	0.00042
ALKBH3	3.7e-07	0.035	0	9.5e-06	0.0019	0.63	1.3e-08	0.0055	0.00054
ALKBH4	0.031	0	9.5e-06	0	0.0042	0	0	0.00017	0.13
ALKBH5	2.6e-14	0.31	0.0019	0.0042	0	0.0041	0.17	0	3.3e-11
ALKBH6	0.32	9.8e-08	0.63	0	0.0041	0	0	0.00011	0.81
ALKBH7	0.34	1.1e-08	1.3e-08	0	0.17	0	0	8.4e-15	0.0011
ALKBH8	0	0.085	0.0055	0.00017	0	0.00011	8.4e-15	0	0
FTO	0.0015	0.00042	0.00054	0.13	3.3e-11	0.81	0.0011	0	0
