# Supplementary material for: ALKBH family members as novel biomarkers and prognostic factors in human breast cancer
Source: Aging (Albany NY). 2022 Aug 17;14(16):6579–93. doi: 10.18632/aging.204231 (PMC9467415; doi:10.18632/aging.204231)
Supplement: Supplementary Table 2 [file aging-14-204231-s003.xlsx]

## Sheet: 工作表1
Supplementary Table 2. The ALKB family associated co-expressed molecules in BRCA.
Gene	Log Ratio	p-Value	q-Value
SLIT2	-1.13	2.7e-25	5.41e-21
PLXNC1	-1.15	1.97e-23	9.87e-20
THSD7A	-0.9	5.26e-23	2.11e-19
PREX2	-1.17	1.01e-22	2.89e-19
TSHZ2	-0.96	2.62e-22	5.83e-19
ZNF366	-0.84	5.77e-22	9.59e-19
GALNT10	-0.72	6.23e-22	9.59e-19
MCTP1	-0.81	7.23e-22	9.84e-19
HGF	-0.9	7.37e-22	9.84e-19
TLL1	-1	9.24e-22	1.16e-18
AKAP12	-0.81	2.56e-21	2.47e-18
RUNX1T1	-0.93	3.35e-21	3.04e-18
BICC1	-1.12	4.74e-21	3.95e-18
PRICKLE2	-0.71	5.34e-21	4.28e-18
CPED1	-0.86	6.47e-21	4.98e-18
SCN7A	-1.32	1.11e-20	7.39e-18
PTPRG	-0.72	1.76e-20	1.14e-17
SVEP1	-0.95	2.28e-20	1.43e-17
SEMA5A	-0.81	2.4e-20	1.46e-17
FAT4	-0.83	2.9e-20	1.66e-17
FLRT2	-0.86	2.9e-20	1.66e-17
FBN1	-0.85	8.73e-20	4.6e-17
PRKG1	-1.01	8.98e-20	4.6e-17
IL6ST	-1.36	2.13e-19	9.47e-17
BNC2	-0.79	2.44e-19	1.06e-16
LAMA2	-0.97	2.54e-19	1.08e-16
PCDHGA9	-0.84	4.76e-19	1.79e-16
COL14A1	-1.04	5.54e-19	1.95e-16
ITGA8	-1.04	8.19e-19	2.69e-16
NRK	-1.2	3.32e-18	8.31e-16
ARHGAP20	-0.73	3.39e-18	8.35e-16
OSMR	-0.71	3.42e-18	8.35e-16
PIK3CG	-0.79	3.48e-18	8.4e-16
SLIT3	-0.74	4.26e-18	1.01e-15
MXRA5	-0.72	5.43e-18	1.24e-15
PARD3B	-0.82	8.18e-18	1.76e-15
MAN1A1	-0.79	9.47e-18	1.98e-15
NFATC2	-0.91	9.67e-18	2e-15
ABCA6	-0.93	1e-17	2.05e-15
RBMS3	-0.73	1.02e-17	2.06e-15
ZFPM2	-0.72	1.07e-17	2.15e-15
CYBRD1	-0.81	1.13e-17	2.23e-15
ECM2	-0.73	1.2e-17	2.35e-15
EBF2	-0.81	1.46e-17	2.83e-15
PCDH7	-0.79	1.53e-17	2.92e-15
PALM2AKAP2	-0.77	2.12e-17	3.83e-15
TLR3	-0.71	2.21e-17	3.94e-15
PCDHGB7	-0.83	3.17e-17	5.47e-15
SERINC5	-0.89	3.43e-17	5.87e-15
AOX1	-0.98	3.65e-17	6.16e-15
HTR2B	-0.75	4.38e-17	7.19e-15
AVPR1A	-0.76	4.93e-17	7.9e-15
CLMP	-0.77	5.41e-17	8.51e-15
RAB27B	-0.88	5.57e-17	8.64e-15
HMCN1	-0.9	6.85e-17	1.05e-14
KIRREL1	-0.9	7.46e-17	1.11e-14
NHSL2	-0.8	7.86e-17	1.16e-14
VCAN	-0.76	1.05e-16	1.46e-14
CYSLTR1	-0.77	1.34e-16	1.8e-14
MAN2A1	-0.71	2.17e-16	2.73e-14
CACNA2D1	-1.11	3.08e-16	3.67e-14
DOC2B	-0.94	3.74e-16	4.35e-14
RALGAPA2	-0.8	3.81e-16	4.41e-14
SLC40A1	-1.09	4.43e-16	5.07e-14
OMD	-1.07	5.19e-16	5.84e-14
ANGPTL1	-0.85	5.22e-16	5.84e-14
PCDHGA12	-0.77	1.13e-15	1.11e-13
SIGLEC6	-0.82	1.57e-15	1.44e-13
AR	-1.45	1.71e-15	1.55e-13
SEMA3C	-0.77	2.28e-15	1.98e-13
GCSAML	-0.73	2.45e-15	2.12e-13
ABI3BP	-0.97	2.61e-15	2.24e-13
TNIK	-0.88	3.05e-15	2.56e-13
MS4A2	-1.04	3.58e-15	2.97e-13
IGF1	-0.93	3.87e-15	3.16e-13
ACER2	-0.76	3.9e-15	3.18e-13
ARHGEF38	-0.94	4.07e-15	3.27e-13
SPON1	-0.86	4.87e-15	3.84e-13
IL1RL1	-0.79	6.2e-15	4.7e-13
CCDC80	-0.71	6.6e-15	4.96e-13
CD84	-0.75	7.46e-15	5.53e-13
ABCB1	-0.79	7.57e-15	5.59e-13
VGF	1.07	8.74e-15	6.36e-13
ZFHX4	-0.72	9.39e-15	6.81e-13
RAPGEF6	-0.71	9.88e-15	7.11e-13
INPP4B	-0.91	1.2e-14	8.26e-13
ADAMTS12	-0.86	1.58e-14	1.06e-12
MMRN1	-1.03	1.68e-14	1.11e-12
PWAR5	-0.83	1.92e-14	1.26e-12
DDR2	-0.77	2e-14	1.31e-12
UNC5C	-0.83	2.44e-14	1.56e-12
PODN	-0.78	2.83e-14	1.74e-12
COL8A1	-0.77	3.99e-14	2.29e-12
CCR4	-0.86	3.99e-14	2.29e-12
EDIL3	-1.03	4.65e-14	2.59e-12
CNTN1	-1.05	4.66e-14	2.59e-12
DCN	-0.8	4.92e-14	2.72e-12
CCN4	-0.72	5.3e-14	2.87e-12
ABCA9	-0.89	5.51e-14	2.97e-12
ADAM23	-0.77	5.53e-14	2.97e-12
ITGBL1	-0.72	7.12e-14	3.75e-12
MS4A7	-0.72	1.21e-13	5.87e-12
CILP	-1.04	1.23e-13	5.96e-12
UGCG	-0.81	1.23e-13	5.97e-12
KERA	-0.89	1.26e-13	6.08e-12
NBEAL1	-0.71	1.36e-13	6.45e-12
SCN2B	-0.89	1.37e-13	6.5e-12
SIDT1	-0.97	1.37e-13	6.5e-12
OGN	-1.21	1.54e-13	7.17e-12
ST8SIA6	-1.14	1.9e-13	8.63e-12
RASEF	-0.94	2.1e-13	9.46e-12
F2RL2	-0.96	2.16e-13	9.7e-12
GALNT15	-0.75	2.17e-13	9.71e-12
ABCA8	-1.17	2.2e-13	9.82e-12
ADAMTS15	-1.2	2.22e-13	9.83e-12
CHRNA6	-0.75	2.23e-13	9.87e-12
ADAMTS2	-0.72	2.24e-13	9.88e-12
CX3CR1	-0.83	2.28e-13	9.99e-12
IL7R	-1.02	2.39e-13	1.04e-11
P2RY12	-0.75	2.43e-13	1.06e-11
CPA3	-1.11	3.44e-13	1.46e-11
TMC5	-1.41	3.68e-13	1.55e-11
DDI2	-0.71	3.72e-13	1.56e-11
POSTN	-0.76	3.79e-13	1.58e-11
TAOK1	-0.73	3.9e-13	1.62e-11
FAT3	-0.82	3.93e-13	1.63e-11
COL3A1	-0.71	5.4e-13	2.13e-11
CHL1	-0.92	5.87e-13	2.29e-11
ROR1	-0.76	6.04e-13	2.35e-11
GXYLT2	-0.71	6.65e-13	2.53e-11
GUCY1A2	-0.71	6.82e-13	2.59e-11
SNORD116-28	-0.77	9.43e-13	3.38e-11
IQGAP2	-0.71	9.61e-13	3.44e-11
GALNT5	-0.96	1.11e-12	3.88e-11
SHISA6	-0.71	1.18e-12	4.07e-11
PLCL1	-0.72	1.43e-12	4.83e-11
EPHA3	-0.82	1.43e-12	4.84e-11
FREM1	-0.87	1.43e-12	4.84e-11
THSD7B	-0.8	1.46e-12	4.91e-11
PDE3A	-0.78	1.51e-12	5.06e-11
SFRP4	-0.86	1.64e-12	5.44e-11
NCOA2	-0.72	1.65e-12	5.47e-11
SLC24A2	-0.89	1.67e-12	5.52e-11
CDKL5	-0.83	1.75e-12	5.74e-11
PTGER3	-0.95	2.23e-12	7.02e-11
PGM5	-0.76	2.35e-12	7.39e-11
NCAM2	-1.09	2.44e-12	7.61e-11
ZSCAN23	-0.77	2.83e-12	8.63e-11
NTN4	-0.87	3.57e-12	1.06e-10
CYP4Z2P	-1.48	4.22e-12	1.23e-10
F13A1	-0.75	4.77e-12	1.37e-10
C1QTNF7	-0.8	5.98e-12	1.67e-10
MICALCL	-0.74	5.98e-12	1.67e-10
ADCY5	-1.17	6.23e-12	1.72e-10
ANKRD30A	-1.89	6.66e-12	1.82e-10
LRRC15	-0.85	6.83e-12	1.85e-10
PRND	-0.85	7.28e-12	1.96e-10
LRRN4CL	-0.72	8.18e-12	2.16e-10
SORCS2	-0.78	9.31e-12	2.41e-10
UHMK1	-0.73	1.1e-11	2.78e-10
SELP	-1	1.24e-11	3.08e-10
NLGN4X	-0.88	1.29e-11	3.16e-10
TNXB	-0.75	1.3e-11	3.2e-10
TENM3	-0.76	1.35e-11	3.3e-10
NBEA	-0.74	1.37e-11	3.33e-10
NR2F1	-0.74	1.57e-11	3.76e-10
MAST1	0.86	1.61e-11	3.86e-10
NEK10	-1.29	1.75e-11	4.15e-10
SNURF	-0.78	2.17e-11	5.05e-10
THBS4	-1.01	2.41e-11	5.52e-10
MFAP4	-0.84	2.48e-11	5.67e-10
MYH11	-0.86	2.58e-11	5.83e-10
TNC	-0.73	3.21e-11	7.06e-10
GREM2	-0.78	3.27e-11	7.15e-10
CAVIN2	-0.73	3.3e-11	7.19e-10
SNORD116-4	-0.92	4.56e-11	9.45e-10
DLL3	0.89	4.61e-11	9.53e-10
SLC18A2	-0.8	5.25e-11	1.07e-09
CELF4	0.79	5.57e-11	1.14e-09
FAM184B	-1.01	5.9e-11	1.19e-09
C4A	-0.96	6.92e-11	1.36e-09
AMIGO2	-0.71	7.57e-11	1.47e-09
CLIC6	-1.3	8.03e-11	1.55e-09
TNFRSF11B	-0.77	9.5e-11	1.79e-09
ALDH1A2	-0.74	9.54e-11	1.79e-09
GRPR	-1.35	9.88e-11	1.85e-09
PTPRT	-1.42	1.18e-10	2.16e-09
MAMDC2	-0.73	1.18e-10	2.17e-09
GPR174	-0.71	1.26e-10	2.29e-09
MEOX2	-0.72	1.41e-10	2.53e-09
PLCXD3	-0.84	1.64e-10	2.9e-09
PWWP3B	-0.96	2.26e-10	3.84e-09
NAV3	-0.74	2.56e-10	4.3e-09
SCUBE2	-1.28	2.65e-10	4.43e-09
DNAH5	-0.87	2.93e-10	4.82e-09
FCER1A	-0.79	3.09e-10	5.05e-09
SFRP2	-0.71	3.09e-10	5.05e-09
TNN	-0.86	3.37e-10	5.47e-09
ACOX2	-0.91	3.58e-10	5.77e-09
TENM2	-0.87	3.65e-10	5.86e-09
ABCC11	-1.43	3.83e-10	6.11e-09
NEK5	-0.74	4.15e-10	6.55e-09
CFAP57	-0.73	4.21e-10	6.63e-09
SYT17	-0.8	4.36e-10	6.82e-09
P2RY10	-0.73	4.37e-10	6.83e-09
ABAT	-0.81	4.56e-10	7.08e-09
CAPN13	-1.04	4.71e-10	7.28e-09
CTTNBP2	-0.75	6.01e-10	8.94e-09
ASPN	-0.79	6.06e-10	9.01e-09
KCNH1	-0.94	6.52e-10	9.61e-09
PCDH19	-0.74	6.84e-10	1e-08
ENTPD3	-0.74	7.73e-10	1.12e-08
CTSG	-0.85	8.07e-10	1.17e-08
DPT	-0.72	8.29e-10	1.19e-08
MKRN3	1.03	8.84e-10	1.26e-08
VWA2	-0.96	9.23e-10	1.31e-08
STK32B	-0.89	9.32e-10	1.33e-08
CYP4X1	-1.11	1.21e-09	1.67e-08
SLC16A6	-0.9	1.3e-09	1.78e-08
NOSTRIN	-0.72	1.36e-09	1.85e-08
AMPH	-0.73	1.38e-09	1.87e-08
SEMA3D	-0.74	1.38e-09	1.87e-08
BAIAP2L2	0.72	1.46e-09	1.96e-08
TFAP2B	-1.58	1.59e-09	2.1e-08
TBC1D9	-0.77	1.81e-09	2.37e-08
TPSAB1	-0.81	1.99e-09	2.57e-08
LRRC4C	-0.72	2.04e-09	2.63e-08
CYP4Z1	-1.58	3e-09	3.69e-08
ERBB4	-1.19	3.28e-09	4e-08
TP63	-0.91	3.38e-09	4.11e-08
COL17A1	-1.14	3.67e-09	4.41e-08
C7	-1.17	3.83e-09	4.58e-08
KCND3	-0.88	5.02e-09	5.81e-08
FOXA1	-1.12	5.13e-09	5.91e-08
PRG4	-0.9	5.25e-09	6.03e-08
GREB1L	-0.86	6.29e-09	7.06e-08
SEMA3E	-0.94	6.44e-09	7.21e-08
BANK1	-0.75	6.57e-09	7.35e-08
IL33	-0.81	6.59e-09	7.36e-08
C9ORF152	-0.86	7.02e-09	7.81e-08
HORMAD1	1.13	7.83e-09	8.55e-08
CCDC170	-0.81	7.95e-09	8.66e-08
FSD1	0.71	8.1e-09	8.79e-08
COL10A1	-0.77	8.66e-09	9.31e-08
CCL14	-0.82	9.79e-09	1.04e-07
TSIX	0.98	9.82e-09	1.04e-07
NAT1	-1.07	9.83e-09	1.04e-07
SCARA5	-0.89	1.09e-08	1.13e-07
THSD4	-0.79	1.25e-08	1.28e-07
CACNA1D	-0.72	1.28e-08	1.31e-07
PCSK1N	1.05	1.29e-08	1.31e-07
HABP2	-0.75	1.36e-08	1.38e-07
ASPHD1	0.72	1.38e-08	1.39e-07
SHISA2	-0.94	1.38e-08	1.4e-07
PGR	-1.3	1.44e-08	1.45e-07
CA12	-0.93	1.51e-08	1.51e-07
SLC44A4	-1.14	1.65e-08	1.64e-07
ZBTB16	-0.86	1.86e-08	1.81e-07
COL6A6	-0.72	1.91e-08	1.86e-07
TMEM26	-0.76	2e-08	1.94e-07
GFRA1	-1.32	2.15e-08	2.07e-07
FGF10	-0.9	2.48e-08	2.34e-07
PIEZO2	-0.73	2.59e-08	2.43e-07
AGR2	-1.32	2.6e-08	2.44e-07
PCDH8	0.72	2.75e-08	2.55e-07
GFRA3	0.82	4.18e-08	3.71e-07
CLDN19	-0.72	4.31e-08	3.81e-07
FLRT3	-0.83	4.47e-08	3.93e-07
RELN	-0.78	4.75e-08	4.14e-07
CLCA2	-1.22	4.98e-08	4.32e-07
TLX1	0.96	5.13e-08	4.44e-07
SOWAHA	-0.91	6.72e-08	5.65e-07
CT83	0.91	7.13e-08	5.96e-07
TMEM132C	-0.85	7.22e-08	6.01e-07
COL4A6	-0.81	8.49e-08	6.95e-07
HCAR1	-0.71	1.02e-07	8.12e-07
CES1	-0.72	1.23e-07	9.61e-07
ESR1	-1.15	1.36e-07	1.048e-06
TMEM45B	-0.83	1.63e-07	1.228e-06
ACKR1	-0.92	1.67e-07	1.26e-06
TPSB2	-0.74	1.83e-07	1.367e-06
KCNE4	-0.76	1.87e-07	1.393e-06
DDC	0.71	1.9e-07	1.409e-06
CD36	-0.71	2.25e-07	1.636e-06
COL11A2	0.73	2.29e-07	1.664e-06
CAPN8	-1.04	2.33e-07	1.69e-06
AK5	-0.76	2.56e-07	1.83e-06
TDRD9	-0.71	2.75e-07	1.948e-06
RANBP3L	-0.78	2.84e-07	2.003e-06
SORCS1	-1.05	2.86e-07	2.015e-06
TNNT2	0.72	3.02e-07	2.113e-06
KLHDC7A	-1.07	3.19e-07	2.223e-06
SLC7A2	-0.99	3.4e-07	2.35e-06
ADIPOQ	-1.24	4.35e-07	2.918e-06
KLK4	-0.72	5.3e-07	3.471e-06
CYP21A2	-0.71	5.81e-07	3.767e-06
PCDHA6	-0.77	5.85e-07	3.794e-06
MSLN	1.15	6.28e-07	4.034e-06
ADH1B	-1.22	7.48e-07	4.701e-06
DUSP9	0.74	7.85e-07	4.909e-06
PLIN1	-0.9	8.02e-07	5.013e-06
PHYHD1	-0.75	8.31e-07	5.167e-06
GP2	-1.21	8.65e-07	5.362e-06
MMP3	-0.71	8.89e-07	5.484e-06
SHISA9	-0.89	9.53e-07	5.846e-06
SLC1A1	-0.78	1.015e-06	6.184e-06
ECRG4	-0.78	1.132e-06	6.817e-06
GPR158	0.73	1.297e-06	7.691e-06
MSI1	0.73	1.311e-06	7.769e-06
PI16	-0.88	1.45e-06	8.472e-06
ACTL8	0.91	1.944e-06	1.101e-05
TCAM1P	0.74	2.019e-06	1.138e-05
B3GALT5	-0.73	2.126e-06	1.19e-05
TFF1	-1.42	2.241e-06	1.245e-05
MLPH	-0.74	2.46e-06	1.352e-05
LRRC31	-1	2.633e-06	1.434e-05
DACH1	-0.8	2.634e-06	1.435e-05
SRARP	-1.15	2.694e-06	1.464e-05
AGR3	-1.27	3.129e-06	1.67e-05
AREG	-0.81	3.422e-06	1.803e-05
FOXD1	0.71	3.433e-06	1.809e-05
CD300LG	-0.74	3.552e-06	1.863e-05
CHRDL1	-0.76	3.764e-06	1.962e-05
AFF3	-0.81	4.051e-06	2.099e-05
ADAMTS16	-0.73	4.075e-06	2.11e-05
TOX3	-0.81	4.893e-06	2.489e-05
ANKRD30B	-0.95	5.163e-06	2.608e-05
SPDEF	-0.77	5.405e-06	2.719e-05
SCGB2A2	-1.5	5.408e-06	2.719e-05
NKX2-5	0.73	5.802e-06	2.894e-05
MAOB	-0.73	6.236e-06	3.083e-05
CYP4F22	-0.87	6.334e-06	3.125e-05
C6	-0.71	6.626e-06	3.258e-05
TRARG1	-0.94	6.854e-06	3.359e-05
F7	-0.77	7.051e-06	3.441e-05
JCHAIN	-0.79	7.674e-06	3.715e-05
CLSTN2	-0.75	7.845e-06	3.794e-05
FSIP1	-0.84	8.014e-06	3.868e-05
SLC26A3	-0.75	8.163e-06	3.928e-05
HGD	-0.84	8.276e-06	3.978e-05
MAPT	-0.75	8.575e-06	4.108e-05
SIX3	0.71	9.208e-06	4.377e-05
ART3	0.85	9.455e-06	4.483e-05
EN1	0.71	1.084e-05	5.061e-05
SBSN	0.8	1.092e-05	5.088e-05
PLIN4	-0.76	1.155e-05	5.333e-05
LRG1	-0.82	1.174e-05	5.415e-05
PCK1	-0.72	1.269e-05	5.801e-05
HPX	-0.75	1.303e-05	5.943e-05
SLITRK6	-0.93	1.327e-05	6.039e-05
CXADRP3	-0.74	1.407e-05	6.367e-05
BCAS1	-0.81	1.511e-05	6.765e-05
CCL21	-0.78	1.968e-05	8.585e-05
HS6ST3	-0.83	1.99e-05	8.663e-05
ALOX15B	-0.75	2.446e-05	0.0001043
GLYATL1	-0.72	2.454e-05	0.0001045
ROPN1	0.83	2.733e-05	0.0001147
CYP4F11	-0.71	3.309e-05	0.0001363
LRP1B	-0.8	4.478e-05	0.000178
HMGCS2	-1.07	4.788e-05	0.0001888
SDR16C5	-0.84	4.861e-05	0.0001913
MS4A1	-0.73	4.874e-05	0.0001916
RGS22	-0.73	4.953e-05	0.0001945
ROPN1B	0.75	5.508e-05	0.0002137
TFF3	-1.01	6.042e-05	0.0002317
A2ML1	0.91	7.189e-05	0.0002701
MAGEA6	0.84	7.659e-05	0.0002856
C16ORF89	-0.73	7.782e-05	0.0002898
VGLL1	0.89	8.438e-05	0.0003117
CDC20B	-0.8	8.849e-05	0.0003257
FABP4	-0.81	9.279e-05	0.0003391
CEACAM6	-0.89	9.788e-05	0.0003551
SYT9	-0.83	0.0001024	0.00037
LEP	-0.72	0.0001051	0.0003789
TTYH1	0.71	0.0001057	0.0003804
CNTNAP2	-0.78	0.0001094	0.0003923
ZIC1	0.76	0.0001115	0.0003992
CYP4B1	-0.72	0.0001144	0.0004075
PRAME	1.04	0.0001325	0.0004657
LY6D	0.76	0.0001453	0.0005056
CCL19	-0.71	0.0001908	0.0006442
ELOVL2	-0.72	0.000192	0.0006471
CA9	0.82	0.0002088	0.0006976
PIP	-1.04	0.0002402	0.0007906
MAGEA3	0.73	0.0003156	0.001005
ABCC8	-0.72	0.0003993	0.001243
SERPINA11	-0.78	0.0004103	0.001273
SLC6A4	-0.72	0.0005159	0.001558
CYP2B7P	-0.96	0.0005901	0.001756
BMPR1B	-0.8	0.0006005	0.001783
PIGR	-0.74	0.0006036	0.001791
SCGB1D2	-0.99	0.0007058	0.002058
UGT2B11	-0.87	0.0007371	0.00214
MUCL1	-0.92	0.0008001	0.002303
BPIFB1	-0.76	0.0009793	0.002751
HOXB13	0.72	0.001793	0.004697
CLEC3A	-1.05	0.002074	0.005356
