# Supplementary material for: ALKBH family members as novel biomarkers and prognostic factors in human breast cancer
Source: Aging (Albany NY). 2022 Aug 17;14(16):6579–93. doi: 10.18632/aging.204231 (PMC9467415; doi:10.18632/aging.204231)
Supplement: Supplementary Table 3 [file aging-14-204231-s004.xlsx]

## Sheet: GO_BP
Supplementary Table 3. The GO (BP, CC, and MF) and KEGG pathway analysis of the ALKBH family associated molecules.
ONTOLOGY	ID	Description	GeneRatio	BgRatio	pvalue	p.adjust	qvalue	geneID	Count
BP	GO:0043062	extracellular structure organization	34/371	422/18670	4.62969e-12	8.79872e-09	7.58051e-09	CD36/COL3A1/COL4A6/COL8A1/COL10A1/COL11A2/COL17A1/VCAN/CTSG/DCN/DPT/ECM2/FBN1/TNC/LAMA2/MFAP4/MMP3/MYH11/DDR2/TNFRSF11B/SFRP2/TLL1/TNXB/TPSAB1/COL14A1/ITGA8/ADAMTS2/KLK4/POSTN/FLRT2/ABI3BP/NTN4/THSD4/CCDC80	34
BP	GO:0030198	extracellular matrix organization	33/371	368/18670	5.12862e-13	1.94939e-09	1.67949e-09	COL3A1/COL4A6/COL8A1/COL10A1/COL11A2/COL17A1/VCAN/CTSG/DCN/DPT/ECM2/FBN1/TNC/LAMA2/MFAP4/MMP3/MYH11/DDR2/TNFRSF11B/SFRP2/TLL1/TNXB/TPSAB1/COL14A1/ITGA8/ADAMTS2/KLK4/POSTN/FLRT2/ABI3BP/NTN4/THSD4/CCDC80	33
BP	GO:0031589	cell-substrate adhesion	26/371	354/18670	1.15113e-08	1.07969e-05	9.30199e-06	CD36/COL3A1/COL8A1/COL17A1/ECM2/EPHA3/CEACAM6/DDR2/CCL21/ITGA8/ITGBL1/SEMA3E/EDIL3/MSLN/AGR2/POSTN/MMRN1/ABI3BP/TTYH1/NTN4/TNN/ADAMTS12/CCDC80/FREM1/ACER2/VWA2	26
BP	GO:0007409	axonogenesis	24/371	468/18670	2.39409e-05	0.00349997	0.00301539	BMPR1B/EPHA3/FOXD1/GFRA1/GFRA3/LAMA2/MAPT/RELN/SLIT3/CDKL5/UNC5C/SEMA5A/SLIT2/SEMA3E/PLXNC1/SEMA3C/CHL1/FLRT3/FLRT2/LRRC4C/NTN4/TNN/SLITRK6/SEMA3D	24
BP	GO:0051271	negative regulation of cellular component movement	23/371	384/18670	2.89786e-06	0.000779598	0.000671659	ALOX15B/COL3A1/CX3CR1/DACH1/DCN/ERBB4/MEOX2/PRKG1/PTPRG/CCL21/SFRP2/SEMA5A/SLIT2/ADIPOQ/SEMA3E/SEMA3C/PTPRT/TNN/MCTP1/NAV3/IL33/PODN/SEMA3D	23
BP	GO:0040013	negative regulation of locomotion	23/371	396/18670	4.83202e-06	0.00102883	0.000886386	ALOX15B/COL3A1/CX3CR1/DACH1/DCN/ERBB4/MEOX2/PRKG1/PTPRG/CCL21/SFRP2/SEMA5A/SLIT2/ADIPOQ/SEMA3E/SEMA3C/PTPRT/TNN/MCTP1/NAV3/IL33/PODN/SEMA3D	23
BP	GO:0098742	cell-cell adhesion via plasma-membrane adhesion molecules	22/371	273/18670	3.06152e-08	1.93947e-05	1.67094e-05	CEACAM6/PCDH7/PCDH8/SELP/CD84/ADIPOQ/PTPRT/FLRT3/PCDHGA12/TENM3/PCDHGB7/PCDHGA9/PCDHA6/TENM2/PCDH19/LRRC4C/CLSTN2/FAT4/HMCN1/FAT3/CLDN19/AMIGO2	22
BP	GO:0007389	pattern specification process	22/371	446/18670	9.23217e-05	0.00762859	0.00657238	AR/BMPR1B/NKX2-5/DNAH5/EN1/ERBB4/FGF10/FOXD1/FOXA1/MEOX2/PCDH8/RELN/SFRP2/SIX3/ZIC1/ZBTB16/TP63/ALDH1A2/SEMA3C/DLL3/GREM2/BICC1	22
BP	GO:0050804	modulation of chemical synaptic transmission	21/371	436/18670	0.000184378	0.0132231	0.0113923	ABAT/CACNA1D/CX3CR1/LAMA2/MAPT/PLCL1/RELN/SLC6A4/CHRNA6/ADIPOQ/AKAP12/SLC24A2/CELF4/NLGN4X/SORCS2/LRRC4C/CLSTN2/MCTP1/SYT9/SHISA6/SHISA9	21
BP	GO:0099177	regulation of trans-synaptic signaling	21/371	437/18670	0.000190223	0.0133896	0.0115357	ABAT/CACNA1D/CX3CR1/LAMA2/MAPT/PLCL1/RELN/SLC6A4/CHRNA6/ADIPOQ/AKAP12/SLC24A2/CELF4/NLGN4X/SORCS2/LRRC4C/CLSTN2/MCTP1/SYT9/SHISA6/SHISA9	21
BP	GO:0055074	calcium ion homeostasis	21/371	471/18670	0.000515049	0.0227985	0.0196419	ADCY5/AVPR1A/CACNA1D/CACNA2D1/MS4A1/CD36/CCR4/CX3CR1/ESR1/F2RL2/HTR2B/PIK3CG/PTGER3/CCL14/CCL19/CCL21/TFAP2B/CYSLTR1/SLC24A2/P2RY10/GPR174	21
BP	GO:0050727	regulation of inflammatory response	21/371	485/18670	0.000750219	0.0286862	0.0247144	C4A/C6/C7/ESR1/FABP4/HGF/IGF1/IL6ST/LEP/MMP3/PIK3CG/PTGER3/CCL14/SLC7A2/TLR3/CCN4/IL1RL1/OSMR/ADIPOQ/ADAMTS12/IL33	21
BP	GO:0001655	urogenital system development	20/371	330/18670	1.08697e-05	0.00206579	0.00177977	ALOX15B/AR/DCN/ESR1/FBN1/FGF10/FOXD1/FOXA1/TNC/TFAP2B/ZBTB16/ITGA8/TP63/ALDH1A2/SLIT2/ADIPOQ/HOXB13/FAT4/GREB1L/ADAMTS16	20
BP	GO:0001503	ossification	20/371	398/18670	0.000149619	0.0115732	0.00997083	AREG/BMPR1B/VCAN/HGF/TNC/IGF1/IL6ST/LEP/DDR2/OMD/SFRP2/ZBTB16/TP63/CCN4/CLEC3A/ASPN/TNN/FAT4/CHRDL1/RANBP3L	20
BP	GO:0048608	reproductive structure development	20/371	431/18670	0.000421741	0.0201097	0.0173255	ALOX15B/AR/BMPR1B/DCN/ESR1/FGF10/FOXA1/TNC/LEP/PGR/SFRP2/SLIT3/TLR3/VGF/TP63/SLIT2/HOXB13/ZFPM2/GREB1L/NRK	20
BP	GO:0061458	reproductive system development	20/371	434/18670	0.00046047	0.0210873	0.0181677	ALOX15B/AR/BMPR1B/DCN/ESR1/FGF10/FOXA1/TNC/LEP/PGR/SFRP2/SLIT3/TLR3/VGF/TP63/SLIT2/HOXB13/ZFPM2/GREB1L/NRK	20
BP	GO:0006874	cellular calcium ion homeostasis	20/371	458/18670	0.000898301	0.0304861	0.0262652	ADCY5/AVPR1A/CACNA1D/CACNA2D1/MS4A1/CD36/CCR4/CX3CR1/ESR1/F2RL2/HTR2B/PIK3CG/PTGER3/CCL14/CCL19/CCL21/CYSLTR1/SLC24A2/P2RY10/GPR174	20
BP	GO:0072503	cellular divalent inorganic cation homeostasis	20/371	493/18670	0.00215306	0.0500628	0.0431314	ADCY5/AVPR1A/CACNA1D/CACNA2D1/MS4A1/CD36/CCR4/CX3CR1/ESR1/F2RL2/HTR2B/PIK3CG/PTGER3/CCL14/CCL19/CCL21/CYSLTR1/SLC24A2/P2RY10/GPR174	20
BP	GO:0061138	morphogenesis of a branching epithelium	19/371	182/18670	4.16497e-09	5.27701e-06	4.54639e-06	AR/AREG/ESR1/FGF10/FOXD1/HGF/FOXA1/TNC/PGR/SFRP2/TP63/SLIT2/SEMA3E/HOXB13/SEMA3C/NTN4/FAT4/GREB1L/ADAMTS16	19
BP	GO:0001763	morphogenesis of a branching structure	19/371	196/18670	1.42026e-08	1.07969e-05	9.30199e-06	AR/AREG/ESR1/FGF10/FOXD1/HGF/FOXA1/TNC/PGR/SFRP2/TP63/SLIT2/SEMA3E/HOXB13/SEMA3C/NTN4/FAT4/GREB1L/ADAMTS16	19
BP	GO:0007411	axon guidance	19/371	276/18670	2.91773e-06	0.000779598	0.000671659	BMPR1B/EPHA3/FOXD1/GFRA1/GFRA3/LAMA2/RELN/SLIT3/UNC5C/SEMA5A/SLIT2/SEMA3E/PLXNC1/SEMA3C/CHL1/FLRT3/FLRT2/NTN4/SEMA3D	19
BP	GO:0097485	neuron projection guidance	19/371	277/18670	3.07655e-06	0.000779598	0.000671659	BMPR1B/EPHA3/FOXD1/GFRA1/GFRA3/LAMA2/RELN/SLIT3/UNC5C/SEMA5A/SLIT2/SEMA3E/PLXNC1/SEMA3C/CHL1/FLRT3/FLRT2/NTN4/SEMA3D	19
BP	GO:0032103	positive regulation of response to external stimulus	19/371	323/18670	2.72353e-05	0.00375151	0.0032321	CCR4/F7/FABP4/FGF10/IL6ST/PIK3CG/PTGER3/CCL14/CCL19/CCL21/THBS4/TLR3/CCN4/SEMA5A/IL1RL1/OSMR/SLIT2/P2RY12/IL33	19
BP	GO:0030336	negative regulation of cell migration	19/371	334/18670	4.29735e-05	0.00485822	0.00418558	ALOX15B/COL3A1/CX3CR1/DACH1/DCN/ERBB4/MEOX2/PRKG1/PTPRG/CCL21/SFRP2/SLIT2/ADIPOQ/PTPRT/TNN/MCTP1/NAV3/IL33/PODN	19
BP	GO:2000146	negative regulation of cell motility	19/371	349/18670	7.73058e-05	0.00683348	0.00588735	ALOX15B/COL3A1/CX3CR1/DACH1/DCN/ERBB4/MEOX2/PRKG1/PTPRG/CCL21/SFRP2/SLIT2/ADIPOQ/PTPRT/TNN/MCTP1/NAV3/IL33/PODN	19
BP	GO:0045785	positive regulation of cell adhesion	19/371	403/18670	0.000481636	0.0217941	0.0187766	CD36/COL8A1/ECM2/FOXA1/IGF1/IL6ST/IL7R/LEP/CEACAM6/CCL19/CCL21/SFRP2/ZBTB16/EDIL3/AGR2/MMRN1/ABI3BP/P2RY12/CCDC80	19
BP	GO:0009100	glycoprotein metabolic process	19/371	419/18670	0.000769794	0.0286862	0.0247144	BMPR1B/VCAN/DCN/IGF1/LEP/MAN1A1/MAN2A1/CCL19/CCL21/B3GALT5/GALNT5/GALNT10/ADAMTS12/GALNT15/MUCL1/HS6ST3/ST8SIA6/ACER2/GXYLT2	19
BP	GO:0048732	gland development	19/371	434/18670	0.00116399	0.0351964	0.0303233	ALOX15B/AR/AREG/NKX2-5/ERBB4/ESR1/FGF10/HGF/FOXA1/TNC/MAN2A1/PCK1/PGR/SIX3/TP63/ALDH1A2/HOXB13/SEMA3C/NTN4	19
BP	GO:0048871	multicellular organismal homeostasis	19/371	485/18670	0.00402034	0.0742496	0.0639694	ABAT/ADCY5/CD36/FABP4/JCHAIN/LEP/TNFRSF11B/PIGR/PIP/PLCL1/PTGER3/TFAP2B/TFF1/TFF3/UGCG/TP63/ADIPOQ/SLC40A1/EBF2	19
BP	GO:0010975	regulation of neuron projection development	19/371	499/18670	0.00542928	0.0896325	0.0772226	CNTN1/EPHA3/HGF/MAPT/RELN/PTPRG/SFRP2/CDKL5/NR2F1/SEMA5A/SLIT2/SEMA3E/PLXNC1/SEMA3C/TNIK/SYT17/TENM3/LRRC4C/SEMA3D	19
BP	GO:0007160	cell-matrix adhesion	18/371	225/18670	6.22432e-07	0.000236586	0.00020383	CD36/COL3A1/COL17A1/ECM2/EPHA3/CEACAM6/DDR2/CCL21/ITGA8/ITGBL1/SEMA3E/MSLN/POSTN/TNN/ADAMTS12/FREM1/ACER2/VWA2	18
BP	GO:0060485	mesenchyme development	18/371	278/18670	1.23468e-05	0.00223477	0.00192535	NKX2-5/EPHA3/ERBB4/FGF10/FOXD1/HGF/FOXA1/HTR2B/SFRP2/ALDH1A2/SEMA5A/SEMA3E/SEMA3C/DLL3/ZFPM2/BNC2/RANBP3L/SEMA3D	18
BP	GO:0021700	developmental maturation	18/371	284/18670	1.64738e-05	0.00272247	0.00234553	CX3CR1/SLC26A3/FOXA1/IGF1/LEP/PDE3A/PGR/RELN/CCL19/CCL21/SIX3/ALDH1A2/HOXB13/CNTNAP2/ROPN1/NTN4/FAT4/ROPN1B	18
BP	GO:0007204	positive regulation of cytosolic calcium ion concentration	18/371	319/18670	7.55642e-05	0.00683348	0.00588735	ADCY5/AVPR1A/CACNA1D/CACNA2D1/MS4A1/CD36/CCR4/CX3CR1/ESR1/F2RL2/HTR2B/PIK3CG/PTGER3/CCL19/CCL21/CYSLTR1/P2RY10/GPR174	18
BP	GO:0048638	regulation of developmental growth	18/371	347/18670	0.000216159	0.0141658	0.0122045	AR/NKX2-5/ERBB4/IGF1/LEP/MAPT/SFRP2/SLC6A4/CDKL5/SEMA5A/SEMA3E/SEMA3C/AGR2/ZFPM2/SYT17/NRK/PI16/SEMA3D	18
BP	GO:0003002	regionalization	18/371	351/18670	0.00024855	0.0152377	0.013128	AR/BMPR1B/NKX2-5/EN1/FGF10/FOXD1/FOXA1/MEOX2/PCDH8/RELN/SFRP2/SIX3/ZBTB16/TP63/ALDH1A2/SEMA3C/DLL3/GREM2	18
BP	GO:0051480	regulation of cytosolic calcium ion concentration	18/371	357/18670	0.000305066	0.0181181	0.0156096	ADCY5/AVPR1A/CACNA1D/CACNA2D1/MS4A1/CD36/CCR4/CX3CR1/ESR1/F2RL2/HTR2B/PIK3CG/PTGER3/CCL19/CCL21/CYSLTR1/P2RY10/GPR174	18
BP	GO:0018108	peptidyl-tyrosine phosphorylation	18/371	363/18670	0.000372451	0.0193376	0.0166603	AREG/CD36/CNTN1/EPHA3/ERBB4/FGF10/HGF/HPX/IGF1/IL6ST/LEP/ROR1/DDR2/RELN/SFRP2/THBS4/ADIPOQ/BANK1	18
BP	GO:0018212	peptidyl-tyrosine modification	18/371	366/18670	0.000410741	0.0201097	0.0173255	AREG/CD36/CNTN1/EPHA3/ERBB4/FGF10/HGF/HPX/IGF1/IL6ST/LEP/ROR1/DDR2/RELN/SFRP2/THBS4/ADIPOQ/BANK1	18
BP	GO:0042391	regulation of membrane potential	18/371	434/18670	0.00279187	0.0577705	0.0497719	ABAT/CACNA1D/CACNA2D1/CD36/DCN/SLC26A3/KCND3/KCNH1/MAPT/RELN/SCN2B/SCN7A/CHRNA6/KCNE4/CELF4/NLGN4X/PIEZO2/CLDN19	18
BP	GO:0003012	muscle system process	18/371	465/18670	0.0056923	0.0920699	0.0793225	ABAT/CACNA1D/CACNA2D1/NKX2-5/HTR2B/IGF1/IL6ST/KCND3/LEP/MYH11/PIK3CG/PRKG1/PTGER3/SCN2B/SCN7A/TNNT2/KCNE4/PI16	18
BP	GO:0050708	regulation of protein secretion	18/371	472/18670	0.00660776	0.099667	0.0858677	ABAT/ADCY5/ALOX15B/CACNA1D/HTR2B/IGF1/LEP/CCL19/ABCC8/TFAP2B/DOC2B/CCN4/IL1RL1/AKAP12/POSTN/BANK1/IL33/SYT9	18
BP	GO:0010721	negative regulation of cell development	17/371	344/18670	0.000559098	0.0239929	0.020671	COL3A1/ERBB4/FBN1/IGF1/PTPRG/SIX3/SLC6A4/NR2F1/SEMA5A/SLIT2/SEMA3E/SEMA3C/POSTN/DLL3/TNN/PI16/SEMA3D	17
BP	GO:0009101	glycoprotein biosynthetic process	17/371	348/18670	0.000636462	0.0260128	0.0224112	BMPR1B/VCAN/DCN/IGF1/MAN1A1/MAN2A1/CCL19/CCL21/B3GALT5/GALNT5/GALNT10/GALNT15/MUCL1/HS6ST3/ST8SIA6/ACER2/GXYLT2	17
BP	GO:0048545	response to steroid hormone	17/371	385/18670	0.00190204	0.0467703	0.0402948	AR/AREG/AVPR1A/ESR1/FOXA1/MAOB/SCGB2A2/PCK1/PGR/SLIT3/NR2F1/TP63/SLIT2/ADIPOQ/NCOA2/SRARP/ZNF366	17
BP	GO:0050808	synapse organization	17/371	408/18670	0.0034536	0.0680162	0.0585991	CX3CR1/ERBB4/TNC/MAPT/PCDH8/RELN/CDKL5/SEMA3E/FLRT3/FLRT2/NLGN4X/LRRC4C/CLSTN2/CTTNBP2/SLITRK6/AMIGO2/SHISA6	17
BP	GO:0050673	epithelial cell proliferation	17/371	434/18670	0.00634162	0.0977175	0.0841881	AR/AREG/COL8A1/ESR1/FGF10/HGF/HTR2B/IGF1/LEP/PGR/SFRP2/THBS4/TP63/ALDH1A2/SEMA5A/LRG1/SDR16C5	17
BP	GO:0007156	homophilic cell adhesion via plasma membrane adhesion molecules	16/371	168/18670	2.53989e-07	0.000120676	0.000103968	CEACAM6/PCDH7/PCDH8/CD84/PTPRT/PCDHGA12/TENM3/PCDHGB7/PCDHGA9/PCDHA6/PCDH19/CLSTN2/FAT4/HMCN1/FAT3/AMIGO2	16
BP	GO:0060560	developmental growth involved in morphogenesis	16/371	235/18670	2.0281e-05	0.00308352	0.00265659	AREG/ESR1/FGF10/TNC/MAPT/SFRP2/SLIT3/CDKL5/SEMA5A/SLIT2/SEMA3E/SEMA3C/POSTN/FLRT3/SYT17/SEMA3D	16
BP	GO:0060562	epithelial tube morphogenesis	16/371	322/18670	0.000760854	0.0286862	0.0247144	AR/AREG/NKX2-5/ESR1/FGF10/FOXD1/FOXA1/TNC/PGR/SFRP2/SLIT2/SEMA3E/FAT4/GREB1L/ADAMTS12/ADAMTS16	16
BP	GO:0001505	regulation of neurotransmitter levels	16/371	354/18670	0.00202712	0.0487663	0.0420144	ABAT/CACNA1D/CD36/CX3CR1/DDC/MAOB/SLC1A1/SLC6A4/SLC7A2/SLC18A2/DOC2B/CHRNA6/SYT17/MCTP1/SLC44A4/SYT9	16
BP	GO:0031346	positive regulation of cell projection organization	16/371	383/18670	0.00437943	0.0770658	0.0663957	CNTN1/EPHA3/HGF/MAPT/RELN/CCL19/CCL21/CDKL5/SEMA5A/SLIT2/PLXNC1/SYT17/TENM3/TENM2/P2RY12/NAV3	16
BP	GO:1903532	positive regulation of secretion by cell	16/371	399/18670	0.00642759	0.0981175	0.0845328	ABAT/ALOX15B/AVPR1A/CACNA1D/HTR2B/IGF1/LEP/RAB27B/CCL19/SLC6A4/DOC2B/IL1RL1/AKAP12/POSTN/IL33/SYT9	16
BP	GO:0035265	organ growth	15/371	204/18670	1.48916e-05	0.00257285	0.00221663	AR/NKX2-5/ERBB4/ESR1/FGF10/IGF1/LEP/DDR2/SLC6A4/COL14A1/ZFPM2/BNC2/NLGN4X/PI16/VWA2	15
BP	GO:0010810	regulation of cell-substrate adhesion	15/371	215/18670	2.76354e-05	0.00375151	0.0032321	CD36/COL8A1/ECM2/EPHA3/CEACAM6/DDR2/CCL21/SEMA3E/EDIL3/AGR2/POSTN/MMRN1/ABI3BP/CCDC80/ACER2	15
BP	GO:0050730	regulation of peptidyl-tyrosine phosphorylation	15/371	256/18670	0.000197444	0.0134139	0.0115567	AREG/CD36/CNTN1/ERBB4/FGF10/HGF/HPX/IGF1/IL6ST/LEP/RELN/SFRP2/THBS4/ADIPOQ/BANK1	15
BP	GO:0043491	protein kinase B signaling	15/371	269/18670	0.000335952	0.0187787	0.0161787	AREG/CX3CR1/ERBB4/ESR1/F7/FGF10/HGF/IGF1/LEP/PIK3CG/CCL19/CCL21/SEMA5A/BANK1/P2RY12	15
BP	GO:0007548	sex differentiation	15/371	270/18670	0.000349423	0.0192486	0.0165836	AR/BMPR1B/DACH1/ESR1/FGF10/LEP/PGR/SFRP2/SLIT3/TLR3/VGF/TP63/SLIT2/ZFPM2/GREB1L	15
BP	GO:0090287	regulation of cellular response to growth factor stimulus	15/371	292/18670	0.000787948	0.028798	0.0248108	DCN/FBN1/FGF10/FOXD1/SFRP2/SFRP4/TFAP2B/ITGA8/SLIT2/ASPN/GREM2/ADAMTS12/CHRDL1/LRG1/SHISA2	15
BP	GO:0007178	transmembrane receptor protein serine/threonine kinase signaling pathway	15/371	349/18670	0.00441279	0.077295	0.0665932	BMPR1B/COL3A1/NKX2-5/FBN1/FGF10/FOXD1/SFRP2/SFRP4/TFAP2B/CILP/ITGA8/ASPN/GREM2/CHRDL1/LRG1	15
BP	GO:0048754	branching morphogenesis of an epithelial tube	14/371	150/18670	1.82417e-06	0.000577805	0.000497805	AR/AREG/ESR1/FGF10/FOXD1/FOXA1/TNC/PGR/SFRP2/SLIT2/SEMA3E/FAT4/GREB1L/ADAMTS16	14
BP	GO:0050731	positive regulation of peptidyl-tyrosine phosphorylation	14/371	192/18670	3.138e-05	0.00402243	0.00346551	AREG/CD36/CNTN1/ERBB4/FGF10/HGF/HPX/IGF1/IL6ST/LEP/RELN/THBS4/ADIPOQ/BANK1	14
BP	GO:1901654	response to ketone	14/371	193/18670	3.32354e-05	0.00407509	0.00351088	ADCY5/AR/AVPR1A/CA9/F7/TNC/MAOB/PCK1/CCL19/CCL21/SLIT3/SLIT2/HOXB13/NCOA2	14
BP	GO:0051896	regulation of protein kinase B signaling	14/371	244/18670	0.000395512	0.0197863	0.0170468	AREG/CX3CR1/ERBB4/ESR1/F7/FGF10/HGF/LEP/PIK3CG/CCL19/CCL21/SEMA5A/BANK1/P2RY12	14
BP	GO:0051897	positive regulation of protein kinase B signaling	13/371	176/18670	5.24536e-05	0.00543382	0.00468149	AREG/CX3CR1/ERBB4/ESR1/F7/FGF10/HGF/LEP/PIK3CG/CCL19/CCL21/SEMA5A/P2RY12	13
BP	GO:0030278	regulation of ossification	13/371	203/18670	0.000220797	0.0142246	0.0122551	AREG/BMPR1B/HGF/IGF1/IL6ST/DDR2/OMD/SFRP2/ZBTB16/TP63/CCN4/TNN/RANBP3L	13
BP	GO:0048762	mesenchymal cell differentiation	13/371	219/18670	0.000458991	0.0210873	0.0181677	EPHA3/ERBB4/FGF10/HGF/FOXA1/HTR2B/SFRP2/ALDH1A2/SEMA5A/SEMA3E/SEMA3C/RANBP3L/SEMA3D	13
BP	GO:0001649	osteoblast differentiation	13/371	225/18670	0.000592296	0.0244709	0.0210828	AREG/BMPR1B/VCAN/HGF/TNC/IGF1/IL6ST/DDR2/SFRP2/TP63/CCN4/TNN/RANBP3L	13
BP	GO:0042445	hormone metabolic process	13/371	232/18670	0.000787809	0.028798	0.0248108	ADH1B/CES1/CPA3/CTSG/CYP21A2/ESR1/FOXA1/LEP/ALDH1A2/UGT2B11/PCSK1N/SLC44A4/SDR16C5	13
BP	GO:0048588	developmental cell growth	13/371	234/18670	0.000852733	0.0295821	0.0254864	IGF1/MAPT/SLIT3/CDKL5/SEMA5A/SLIT2/SEMA3E/SEMA3C/POSTN/FLRT3/SYT17/PI16/SEMA3D	13
BP	GO:0015850	organic hydroxy compound transport	13/371	262/18670	0.00234531	0.0527487	0.0454455	ABAT/CD36/CES1/LEP/MAOB/SLC6A4/SLC18A2/CHRNA6/ADIPOQ/NCOA2/SYT17/P2RY12/SYT9	13
BP	GO:0006836	neurotransmitter transport	13/371	269/18670	0.0029442	0.0598445	0.0515588	ABAT/CACNA1D/DDC/MAOB/SLC1A1/SLC6A4/SLC18A2/DOC2B/CHRNA6/SYT17/MCTP1/SLC44A4/SYT9	13
BP	GO:0001822	kidney development	13/371	278/18670	0.00389199	0.0739673	0.0637262	DCN/FBN1/FGF10/FOXD1/TFAP2B/ZBTB16/ITGA8/ALDH1A2/SLIT2/ADIPOQ/FAT4/GREB1L/ADAMTS16	13
BP	GO:0030522	intracellular receptor signaling pathway	13/371	280/18670	0.00413297	0.0755261	0.0650692	ALOX15B/AR/ESR1/FOXA1/LEP/SCGB2A2/PGR/NR2F1/TP63/ALDH1A2/PRAME/SRARP/ZNF366	13
BP	GO:0072001	renal system development	13/371	293/18670	0.00600904	0.0947101	0.0815971	DCN/FBN1/FGF10/FOXD1/TFAP2B/ZBTB16/ITGA8/ALDH1A2/SLIT2/ADIPOQ/FAT4/GREB1L/ADAMTS16	13
BP	GO:0050768	negative regulation of neurogenesis	13/371	295/18670	0.00634997	0.0977175	0.0841881	COL3A1/ERBB4/PTPRG/SIX3/SLC6A4/NR2F1/SEMA5A/SLIT2/SEMA3E/SEMA3C/DLL3/TNN/SEMA3D	13
BP	GO:0022612	gland morphogenesis	12/371	120/18670	4.87213e-06	0.00102883	0.000886386	AR/AREG/ESR1/FGF10/HGF/FOXA1/TNC/PGR/TP63/HOXB13/SEMA3C/NTN4	12
BP	GO:0071695	anatomical structure maturation	12/371	165/18670	0.000117399	0.00929656	0.00800941	CX3CR1/FOXA1/IGF1/LEP/PDE3A/PGR/SIX3/ALDH1A2/HOXB13/CNTNAP2/NTN4/FAT4	12
BP	GO:0048469	cell maturation	12/371	177/18670	0.000226834	0.0143699	0.0123803	SLC26A3/FOXA1/PDE3A/PGR/CCL19/CCL21/SIX3/HOXB13/CNTNAP2/ROPN1/NTN4/ROPN1B	12
BP	GO:0050920	regulation of chemotaxis	12/371	217/18670	0.00138794	0.0394775	0.0340117	CCR4/F7/FGF10/CCL19/CCL21/THBS4/SEMA5A/SLIT2/SEMA3E/SEMA3C/P2RY12/SEMA3D	12
BP	GO:0060348	bone development	12/371	217/18670	0.00138794	0.0394775	0.0340117	BMPR1B/FBN1/IGF1/LEP/SFRP2/SFRP4/COL14A1/CCN4/FAT4/FREM1/RANBP3L/VWA2	12
BP	GO:0045137	development of primary sexual characteristics	12/371	223/18670	0.0017474	0.043986	0.0378959	AR/BMPR1B/DACH1/ESR1/LEP/PGR/SFRP2/SLIT3/TLR3/VGF/SLIT2/ZFPM2	12
BP	GO:0045444	fat cell differentiation	12/371	223/18670	0.0017474	0.043986	0.0378959	RUNX1T1/FABP4/FGF10/LEP/SFRP2/TFAP2B/ZBTB16/CCN4/ADIPOQ/ZFPM2/EBF2/LRG1	12
BP	GO:0097305	response to alcohol	12/371	233/18670	0.00251458	0.0543063	0.0467874	ABAT/ADCY5/AVPR1A/F7/TNC/LEP/MAOB/CCL19/CCL21/SLIT3/SLIT2/ADIPOQ	12
BP	GO:0090092	regulation of transmembrane receptor protein serine/threonine kinase signaling pathway	12/371	241/18670	0.00330901	0.065851	0.0567337	FBN1/FGF10/FOXD1/SFRP2/SFRP4/TFAP2B/CILP/ITGA8/ASPN/GREM2/CHRDL1/LRG1	12
BP	GO:0048863	stem cell differentiation	12/371	257/18670	0.00550437	0.0897945	0.0773621	NKX2-5/ERBB4/ESR1/FOXA1/HTR2B/SIX3/TP63/ALDH1A2/SEMA5A/SEMA3E/SEMA3C/SEMA3D	12
BP	GO:0046660	female sex differentiation	11/371	115/18670	1.84816e-05	0.00292703	0.00252177	BMPR1B/DACH1/ESR1/FGF10/LEP/PGR/SLIT3/VGF/TP63/SLIT2/ZFPM2	11
BP	GO:0045667	regulation of osteoblast differentiation	11/371	126/18670	4.34569e-05	0.00485822	0.00418558	AREG/BMPR1B/HGF/IGF1/IL6ST/DDR2/SFRP2/TP63/CCN4/TNN/RANBP3L	11
BP	GO:1990138	neuron projection extension	11/371	168/18670	0.000551147	0.0239929	0.020671	MAPT/SLIT3/CDKL5/SEMA5A/SLIT2/SEMA3E/SEMA3C/POSTN/FLRT3/SYT17/SEMA3D	11
BP	GO:0048736	appendage development	11/371	179/18670	0.000932411	0.0308182	0.0265513	BMPR1B/EN1/FGF10/AFF3/MEOX2/SFRP2/TFAP2B/ZBTB16/TP63/ALDH1A2/SEMA3C	11
BP	GO:0060173	limb development	11/371	179/18670	0.000932411	0.0308182	0.0265513	BMPR1B/EN1/FGF10/AFF3/MEOX2/SFRP2/TFAP2B/ZBTB16/TP63/ALDH1A2/SEMA3C	11
BP	GO:0048015	phosphatidylinositol-mediated signaling	11/371	181/18670	0.00102096	0.0320718	0.0276313	DCN/ERBB4/HGF/HTR2B/IGF1/KCNH1/LEP/PIK3CG/RELN/SELP/PREX2	11
BP	GO:0048017	inositol lipid-mediated signaling	11/371	184/18670	0.00116673	0.0351964	0.0303233	DCN/ERBB4/HGF/HTR2B/IGF1/KCNH1/LEP/PIK3CG/RELN/SELP/PREX2	11
BP	GO:0008406	gonad development	11/371	217/18670	0.00422001	0.0760703	0.0655381	AR/BMPR1B/ESR1/LEP/PGR/SFRP2/SLIT3/TLR3/VGF/SLIT2/ZFPM2	11
BP	GO:0010811	positive regulation of cell-substrate adhesion	10/371	121/18670	0.000152239	0.0115732	0.00997083	CD36/COL8A1/ECM2/CEACAM6/CCL21/EDIL3/AGR2/MMRN1/ABI3BP/CCDC80	10
BP	GO:0014065	phosphatidylinositol 3-kinase signaling	10/371	148/18670	0.000764754	0.0286862	0.0247144	DCN/ERBB4/HGF/HTR2B/IGF1/LEP/PIK3CG/RELN/SELP/PREX2	10
BP	GO:0035107	appendage morphogenesis	10/371	148/18670	0.000764754	0.0286862	0.0247144	BMPR1B/EN1/FGF10/AFF3/SFRP2/TFAP2B/ZBTB16/TP63/ALDH1A2/SEMA3C	10
BP	GO:0035108	limb morphogenesis	10/371	148/18670	0.000764754	0.0286862	0.0247144	BMPR1B/EN1/FGF10/AFF3/SFRP2/TFAP2B/ZBTB16/TP63/ALDH1A2/SEMA3C	10
BP	GO:0050729	positive regulation of inflammatory response	10/371	153/18670	0.000987456	0.0319043	0.027487	FABP4/IL6ST/PIK3CG/PTGER3/CCL14/TLR3/CCN4/IL1RL1/OSMR/IL33	10
BP	GO:0001764	neuron migration	10/371	157/18670	0.00120163	0.0359638	0.0309845	CCR4/COL3A1/ERBB4/GFRA3/PRKG1/RELN/CDKL5/CHL1/FLRT2/TNN	10
BP	GO:0071772	response to BMP	10/371	170/18670	0.00217321	0.0500628	0.0431314	BMPR1B/NKX2-5/FBN1/FOXD1/SFRP2/SFRP4/TFAP2B/GREM2/ADAMTS12/CHRDL1	10
BP	GO:0071773	cellular response to BMP stimulus	10/371	170/18670	0.00217321	0.0500628	0.0431314	BMPR1B/NKX2-5/FBN1/FOXD1/SFRP2/SFRP4/TFAP2B/GREM2/ADAMTS12/CHRDL1	10
BP	GO:0030324	lung development	10/371	172/18670	0.00236711	0.0527625	0.0454573	FGF10/FOXA1/TNC/MAN2A1/PGR/ALDH1A2/ADAMTS2/AGR2/ZFPM2/SPDEF	10
BP	GO:0030323	respiratory tube development	10/371	176/18670	0.00279657	0.0577705	0.0497719	FGF10/FOXA1/TNC/MAN2A1/PGR/ALDH1A2/ADAMTS2/AGR2/ZFPM2/SPDEF	10
BP	GO:0008217	regulation of blood pressure	10/371	182/18670	0.00355533	0.0693015	0.0597064	ABAT/AR/AVPR1A/CES1/CPA3/CTSG/LEP/ADIPOQ/POSTN/ADAMTS16	10
BP	GO:0099504	synaptic vesicle cycle	10/371	194/18670	0.00555855	0.0902907	0.0777896	AMPH/CACNA1D/DDC/RAB27B/SLC18A2/DOC2B/CHRNA6/SYT17/NLGN4X/SYT9	10
BP	GO:0002685	regulation of leukocyte migration	10/371	196/18670	0.00596448	0.0947101	0.0815971	CX3CR1/F7/CCL19/CCL21/SELP/THBS4/SLIT2/P2RY12/IL33/GCSAML	10
BP	GO:0060541	respiratory system development	10/371	198/18670	0.00639317	0.0979857	0.0844192	FGF10/FOXA1/TNC/MAN2A1/PGR/ALDH1A2/ADAMTS2/AGR2/ZFPM2/SPDEF	10
BP	GO:0050919	negative chemotaxis	9/371	46/18670	2.52457e-07	0.000120676	0.000103968	SLIT3/UNC5C/SEMA5A/SLIT2/SEMA3E/SEMA3C/FLRT3/FLRT2/SEMA3D	9
BP	GO:0045778	positive regulation of ossification	9/371	90/18670	7.50654e-05	0.00683348	0.00588735	BMPR1B/HGF/IGF1/IL6ST/DDR2/SFRP2/ZBTB16/TP63/CCN4	9
BP	GO:0046545	development of primary female sexual characteristics	9/371	101/18670	0.000183344	0.0132231	0.0113923	BMPR1B/DACH1/ESR1/LEP/PGR/SLIT3/VGF/SLIT2/ZFPM2	9
BP	GO:0015837	amine transport	9/371	102/18670	0.000197627	0.0134139	0.0115567	ABAT/AVPR1A/DDC/LEP/SLC18A2/CHRNA6/SYT17/P2RY12/SYT9	9
BP	GO:0032355	response to estradiol	9/371	134/18670	0.00144697	0.0395678	0.0340895	AREG/ESR1/F7/FGF10/FOXA1/LEP/SLC6A4/ALDH1A2/POSTN	9
BP	GO:0046683	response to organophosphorus	9/371	134/18670	0.00144697	0.0395678	0.0340895	AREG/SLC26A3/PCK1/PDE3A/PIK3CG/SLC6A4/VGF/ADIPOQ/P2RY12	9
BP	GO:0048565	digestive tract development	9/371	134/18670	0.00144697	0.0395678	0.0340895	COL3A1/FGF10/SFRP2/TP63/ALDH1A2/AGR2/SPDEF/FAT4/CLMP	9
BP	GO:0050921	positive regulation of chemotaxis	9/371	135/18670	0.00152382	0.0396716	0.0341789	CCR4/F7/FGF10/CCL19/CCL21/THBS4/SEMA5A/SLIT2/P2RY12	9
BP	GO:0030534	adult behavior	9/371	144/18670	0.00237369	0.0527625	0.0454573	ABAT/EN1/LEP/ZIC1/CHL1/CNTNAP2/NLGN4X/PREX2/SLITRK6	9
BP	GO:0055123	digestive system development	9/371	146/18670	0.00260582	0.0550849	0.0474582	COL3A1/FGF10/SFRP2/TP63/ALDH1A2/AGR2/SPDEF/FAT4/CLMP	9
BP	GO:0014074	response to purine-containing compound	9/371	149/18670	0.00298737	0.0603989	0.0520365	AREG/SLC26A3/PCK1/PDE3A/PIK3CG/SLC6A4/VGF/ADIPOQ/P2RY12	9
BP	GO:0030509	BMP signaling pathway	9/371	157/18670	0.00422288	0.0760703	0.0655381	BMPR1B/NKX2-5/FBN1/FOXD1/SFRP2/SFRP4/TFAP2B/GREM2/CHRDL1	9
BP	GO:0090288	negative regulation of cellular response to growth factor stimulus	9/371	166/18670	0.00605487	0.0947101	0.0815971	DCN/FBN1/SFRP2/SLIT2/ASPN/GREM2/ADAMTS12/CHRDL1/SHISA2	9
BP	GO:0030850	prostate gland development	8/371	48/18670	4.24934e-06	0.00100948	0.000869717	ALOX15B/AR/ESR1/FGF10/FOXA1/TNC/TP63/HOXB13	8
BP	GO:0030199	collagen fibril organization	8/371	54/18670	1.05614e-05	0.00206579	0.00177977	COL3A1/COL11A2/DPT/DDR2/SFRP2/TNXB/COL14A1/ADAMTS2	8
BP	GO:0045669	positive regulation of osteoblast differentiation	8/371	64/18670	3.78012e-05	0.00449007	0.0038684	BMPR1B/HGF/IGF1/IL6ST/DDR2/SFRP2/TP63/CCN4	8
BP	GO:0051705	multi-organism behavior	8/371	67/18670	5.28943e-05	0.00543382	0.00468149	AVPR1A/CX3CR1/DACH1/EN1/GRPR/SLC6A4/CNTNAP2/NLGN4X	8
BP	GO:0014068	positive regulation of phosphatidylinositol 3-kinase signaling	8/371	87/18670	0.000335914	0.0187787	0.0161787	DCN/ERBB4/HGF/IGF1/LEP/PIK3CG/RELN/SELP	8
BP	GO:0070098	chemokine-mediated signaling pathway	8/371	88/18670	0.000363218	0.0193376	0.0166603	CCR4/CX3CR1/ACKR1/CCL14/CCL19/CCL21/SLIT3/SLIT2	8
BP	GO:0001656	metanephros development	8/371	90/18670	0.000423251	0.0201097	0.0173255	FBN1/FGF10/FOXD1/TFAP2B/ITGA8/ADIPOQ/FAT4/GREB1L	8
BP	GO:0015844	monoamine transport	8/371	90/18670	0.000423251	0.0201097	0.0173255	ABAT/MAOB/SLC6A4/SLC18A2/CHRNA6/SYT17/P2RY12/SYT9	8
BP	GO:0008585	female gonad development	8/371	96/18670	0.00065327	0.0264157	0.0227584	BMPR1B/ESR1/LEP/PGR/SLIT3/VGF/SLIT2/ZFPM2	8
BP	GO:1990868	response to chemokine	8/371	97/18670	0.000699901	0.0277117	0.0238749	CCR4/CX3CR1/ACKR1/CCL14/CCL19/CCL21/SLIT3/SLIT2	8
BP	GO:1990869	cellular response to chemokine	8/371	97/18670	0.000699901	0.0277117	0.0238749	CCR4/CX3CR1/ACKR1/CCL14/CCL19/CCL21/SLIT3/SLIT2	8
BP	GO:0007200	phospholipase C-activating G protein-coupled receptor signaling pathway	8/371	100/18670	0.0008561	0.0295821	0.0254864	CX3CR1/ESR1/F2RL2/GRPR/PTGER3/P2RY10/P2RY12/GPR174	8
BP	GO:0015696	ammonium transport	8/371	108/18670	0.00141251	0.0394775	0.0340117	ABAT/MAOB/SLC6A4/SLC18A2/CHRNA6/SYT17/SLC44A4/SYT9	8
BP	GO:0001952	regulation of cell-matrix adhesion	8/371	119/18670	0.0026086	0.0550849	0.0474582	CD36/EPHA3/CEACAM6/DDR2/CCL21/SEMA3E/POSTN/ACER2	8
BP	GO:0048675	axon extension	8/371	121/18670	0.00289262	0.0591121	0.0509278	MAPT/SLIT3/CDKL5/SEMA5A/SLIT2/SEMA3E/SEMA3C/SEMA3D	8
BP	GO:0014066	regulation of phosphatidylinositol 3-kinase signaling	8/371	124/18670	0.00336321	0.0665811	0.0573627	DCN/ERBB4/HGF/IGF1/LEP/PIK3CG/RELN/SELP	8
BP	GO:0002576	platelet degranulation	8/371	128/18670	0.00408066	0.0749303	0.0645559	CD36/F13A1/HGF/IGF1/PCDH7/RAB27B/SELP/MMRN1	8
BP	GO:0003231	cardiac ventricle development	8/371	130/18670	0.00448094	0.0777718	0.067004	NKX2-5/SFRP2/SLIT3/TNNT2/SLIT2/SEMA3C/ZFPM2/GREB1L	8
BP	GO:0030518	intracellular steroid hormone receptor signaling pathway	8/371	132/18670	0.00491073	0.0837027	0.0721137	AR/ESR1/FOXA1/SCGB2A2/PGR/TP63/SRARP/ZNF366	8
BP	GO:0001508	action potential	8/371	133/18670	0.00513713	0.0863993	0.0744369	CACNA1D/CACNA2D1/CD36/KCND3/SCN2B/SCN7A/KCNE4/CLDN19	8
BP	GO:0031644	regulation of neurological system process	8/371	137/18670	0.00612345	0.095001	0.0818478	ABAT/AVPR1A/HGF/RELN/CELF4/NLGN4X/SHISA6/SHISA9	8
BP	GO:0060048	cardiac muscle contraction	8/371	137/18670	0.00612345	0.095001	0.0818478	CACNA1D/CACNA2D1/NKX2-5/KCND3/PIK3CG/SCN2B/TNNT2/KCNE4	8
BP	GO:0007586	digestion	8/371	139/18670	0.00666752	0.0997765	0.0859621	CD36/FGF10/LEP/PTGER3/TFF1/TFF3/UGCG/CAPN8	8
BP	GO:0060740	prostate gland epithelium morphogenesis	7/371	26/18670	5.49195e-07	0.000231943	0.00019983	AR/ESR1/FGF10/FOXA1/TNC/TP63/HOXB13	7
BP	GO:0060512	prostate gland morphogenesis	7/371	28/18670	9.55251e-07	0.000330083	0.000284381	AR/ESR1/FGF10/FOXA1/TNC/TP63/HOXB13	7
BP	GO:0007157	heterophilic cell-cell adhesion via plasma membrane cell adhesion molecules	7/371	46/18670	3.17477e-05	0.00402243	0.00346551	CEACAM6/SELP/TENM3/TENM2/FAT4/HMCN1/AMIGO2	7
BP	GO:0035176	social behavior	7/371	52/18670	7.1643e-05	0.00680788	0.0058653	AVPR1A/CX3CR1/EN1/GRPR/SLC6A4/CNTNAP2/NLGN4X	7
BP	GO:0051703	intraspecies interaction between organisms	7/371	52/18670	7.1643e-05	0.00680788	0.0058653	AVPR1A/CX3CR1/EN1/GRPR/SLC6A4/CNTNAP2/NLGN4X	7
BP	GO:0033627	cell adhesion mediated by integrin	7/371	68/18670	0.000395621	0.0197863	0.0170468	FBN1/PIK3CG/CCL21/SFRP2/ITGBL1/P2RY12/ACER2	7
BP	GO:0051057	positive regulation of small GTPase mediated signal transduction	7/371	71/18670	0.00051583	0.0227985	0.0196419	COL3A1/F2RL2/FGF10/IGF1/RELN/P2RY10/GPR174	7
BP	GO:0050805	negative regulation of synaptic transmission	7/371	72/18670	0.000561791	0.0239929	0.020671	MAPT/SLC6A4/ADIPOQ/SLC24A2/CELF4/NLGN4X/SORCS2	7
BP	GO:0014032	neural crest cell development	7/371	81/18670	0.00113897	0.034964	0.0301231	ERBB4/HTR2B/ALDH1A2/SEMA5A/SEMA3E/SEMA3C/SEMA3D	7
BP	GO:0032642	regulation of chemokine production	7/371	82/18670	0.00122443	0.0363599	0.0313257	ALOX15B/ACKR1/TLR3/IL1RL1/ADIPOQ/POSTN/IL33	7
BP	GO:0014031	mesenchymal cell development	7/371	85/18670	0.00151126	0.0396158	0.0341309	ERBB4/HTR2B/ALDH1A2/SEMA5A/SEMA3E/SEMA3C/SEMA3D	7
BP	GO:0048864	stem cell development	7/371	85/18670	0.00151126	0.0396158	0.0341309	ERBB4/HTR2B/ALDH1A2/SEMA5A/SEMA3E/SEMA3C/SEMA3D	7
BP	GO:0032602	chemokine production	7/371	89/18670	0.00197219	0.0477471	0.0411363	ALOX15B/ACKR1/TLR3/IL1RL1/ADIPOQ/POSTN/IL33	7
BP	GO:0014033	neural crest cell differentiation	7/371	90/18670	0.00210282	0.0499989	0.0430763	ERBB4/HTR2B/ALDH1A2/SEMA5A/SEMA3E/SEMA3C/SEMA3D	7
BP	GO:0030510	regulation of BMP signaling pathway	7/371	91/18670	0.00224005	0.0512916	0.0441901	FBN1/FOXD1/SFRP2/SFRP4/TFAP2B/GREM2/CHRDL1	7
BP	GO:0003073	regulation of systemic arterial blood pressure	7/371	93/18670	0.00253514	0.054441	0.0469034	AR/AVPR1A/CES1/CPA3/CTSG/POSTN/ADAMTS16	7
BP	GO:0051952	regulation of amine transport	7/371	95/18670	0.00285924	0.0587459	0.0506123	ABAT/AVPR1A/LEP/CHRNA6/SYT17/P2RY12/SYT9	7
BP	GO:0022600	digestive system process	7/371	100/18670	0.0038085	0.0727443	0.0626725	CD36/FGF10/LEP/PTGER3/TFF1/TFF3/UGCG	7
BP	GO:0002027	regulation of heart rate	7/371	101/18670	0.00402405	0.0742496	0.0639694	AVPR1A/CACNA1D/CACNA2D1/KCND3/SCN2B/SLC1A1/KCNE4	7
BP	GO:0031532	actin cytoskeleton reorganization	7/371	101/18670	0.00402405	0.0742496	0.0639694	FGF10/SEMA3E/TNIK/BAIAP2L2/THSD7B/NRK/THSD7A	7
BP	GO:0001823	mesonephros development	7/371	102/18670	0.00424872	0.0760703	0.0655381	FGF10/FOXD1/ZBTB16/SLIT2/FAT4/GREB1L/ADAMTS16	7
BP	GO:0014812	muscle cell migration	7/371	104/18670	0.00472639	0.0809235	0.0697194	IGF1/PRKG1/THBS4/CCN4/SLIT2/ADIPOQ/POSTN	7
BP	GO:0042136	neurotransmitter biosynthetic process	7/371	106/18670	0.00524346	0.0874139	0.0753111	ABAT/CD36/CX3CR1/DDC/SLC6A4/SLC7A2/SLC44A4	7
BP	GO:0032526	response to retinoic acid	7/371	108/18670	0.00580187	0.0934445	0.0805067	EPHA3/TNC/LEP/PCK1/SLC6A4/ALDH1A2/ACER2	7
BP	GO:0048846	axon extension involved in axon guidance	6/371	37/18670	8.16536e-05	0.00689701	0.00594209	SLIT3/SEMA5A/SLIT2/SEMA3E/SEMA3C/SEMA3D	6
BP	GO:1902284	neuron projection extension involved in neuron projection guidance	6/371	37/18670	8.16536e-05	0.00689701	0.00594209	SLIT3/SEMA5A/SLIT2/SEMA3E/SEMA3C/SEMA3D	6
BP	GO:0033146	regulation of intracellular estrogen receptor signaling pathway	6/371	39/18670	0.000110823	0.0089625	0.00772161	AR/ESR1/FOXA1/TP63/SRARP/ZNF366	6
BP	GO:0022602	ovulation cycle process	6/371	46/18670	0.000283061	0.017078	0.0147135	BMPR1B/ESR1/LEP/PGR/SLIT3/SLIT2	6
BP	GO:0001755	neural crest cell migration	6/371	57/18670	0.00091312	0.0307148	0.0264622	ERBB4/HTR2B/SEMA5A/SEMA3E/SEMA3C/SEMA3D	6
BP	GO:0030520	intracellular estrogen receptor signaling pathway	6/371	58/18670	0.0010017	0.0319043	0.027487	AR/ESR1/FOXA1/TP63/SRARP/ZNF366	6
BP	GO:0032722	positive regulation of chemokine production	6/371	58/18670	0.0010017	0.0319043	0.027487	ALOX15B/TLR3/IL1RL1/ADIPOQ/POSTN/IL33	6
BP	GO:0046579	positive regulation of Ras protein signal transduction	6/371	64/18670	0.00167974	0.0431397	0.0371668	COL3A1/F2RL2/FGF10/IGF1/P2RY10/GPR174	6
BP	GO:0042698	ovulation cycle	6/371	69/18670	0.00247244	0.0537015	0.0462663	BMPR1B/ESR1/LEP/PGR/SLIT3/SLIT2	6
BP	GO:0071300	cellular response to retinoic acid	6/371	69/18670	0.00247244	0.0537015	0.0462663	EPHA3/TNC/LEP/PCK1/SLC6A4/ALDH1A2	6
BP	GO:0001756	somitogenesis	6/371	70/18670	0.0026599	0.0558579	0.0481242	MEOX2/PCDH8/SFRP2/ALDH1A2/SEMA3C/DLL3	6
BP	GO:0061180	mammary gland epithelium development	6/371	72/18670	0.00306654	0.0616716	0.0531329	AR/AREG/ERBB4/ESR1/FGF10/PGR	6
BP	GO:0051937	catecholamine transport	6/371	77/18670	0.00428506	0.0760703	0.0655381	ABAT/SLC18A2/CHRNA6/SYT17/P2RY12/SYT9	6
BP	GO:0033143	regulation of intracellular steroid hormone receptor signaling pathway	6/371	78/18670	0.00456629	0.0788931	0.06797	AR/ESR1/FOXA1/TP63/SRARP/ZNF366	6
BP	GO:0022617	extracellular matrix disassembly	6/371	80/18670	0.0051692	0.0865557	0.0745717	CTSG/MMP3/DDR2/TLL1/TPSAB1/KLK4	6
BP	GO:0014910	regulation of smooth muscle cell migration	6/371	84/18670	0.00654713	0.099146	0.0854189	IGF1/PRKG1/CCN4/SLIT2/ADIPOQ/POSTN	6
BP	GO:0050886	endocrine process	6/371	84/18670	0.00654713	0.099146	0.0854189	AVPR1A/CES1/CPA3/CTSG/FOXD1/LEP	6
BP	GO:1902668	negative regulation of axon guidance	5/371	28/18670	0.000203388	0.0135627	0.0116849	SEMA5A/SLIT2/SEMA3E/SEMA3C/SEMA3D	5
BP	GO:0003401	axis elongation	5/371	31/18670	0.000334848	0.0187787	0.0161787	AREG/ESR1/FGF10/TNC/SFRP2	5
BP	GO:0009954	proximal/distal pattern formation	5/371	31/18670	0.000334848	0.0187787	0.0161787	EN1/FGF10/SIX3/TP63/ALDH1A2	5
BP	GO:0060603	mammary gland duct morphogenesis	5/371	33/18670	0.000452743	0.0210873	0.0181677	AR/AREG/ESR1/FGF10/PGR	5
BP	GO:0086091	regulation of heart rate by cardiac conduction	5/371	38/18670	0.000882787	0.0302295	0.0260441	CACNA1D/CACNA2D1/KCND3/SCN2B/KCNE4	5
BP	GO:0071526	semaphorin-plexin signaling pathway	5/371	40/18670	0.00112033	0.0349046	0.0300719	SEMA5A/SEMA3E/PLXNC1/SEMA3C/SEMA3D	5
BP	GO:0035136	forelimb morphogenesis	5/371	41/18670	0.00125541	0.0367063	0.0316242	EN1/TFAP2B/ZBTB16/TP63/ALDH1A2	5
BP	GO:0050873	brown fat cell differentiation	5/371	41/18670	0.00125541	0.0367063	0.0316242	FABP4/LEP/ADIPOQ/EBF2/LRG1	5
BP	GO:2001222	regulation of neuron migration	5/371	42/18670	0.00140216	0.0394775	0.0340117	COL3A1/ERBB4/RELN/FLRT2/TNN	5
BP	GO:1902667	regulation of axon guidance	5/371	44/18670	0.00173304	0.043986	0.0378959	SEMA5A/SLIT2/SEMA3E/SEMA3C/SEMA3D	5
BP	GO:0033628	regulation of cell adhesion mediated by integrin	5/371	46/18670	0.00211782	0.0499989	0.0430763	PIK3CG/CCL21/SFRP2/P2RY12/ACER2	5
BP	GO:0060443	mammary gland morphogenesis	5/371	46/18670	0.00211782	0.0499989	0.0430763	AR/AREG/ESR1/FGF10/PGR	5
BP	GO:0048806	genitalia development	5/371	47/18670	0.00233195	0.0527487	0.0454455	AR/ESR1/FGF10/TP63/GREB1L	5
BP	GO:0098868	bone growth	5/371	47/18670	0.00233195	0.0527487	0.0454455	LEP/DDR2/COL14A1/BNC2/VWA2	5
BP	GO:0008038	neuron recognition	5/371	48/18670	0.0025614	0.0546959	0.047123	EPHA3/NCAM2/SEMA5A/CNTNAP2/TNN	5
BP	GO:0015872	dopamine transport	5/371	52/18670	0.0036448	0.0699691	0.0602816	ABAT/SLC18A2/CHRNA6/SYT17/SYT9	5
BP	GO:0044273	sulfur compound catabolic process	5/371	55/18670	0.00464859	0.0799516	0.068882	VCAN/DCN/OMD/OGN/KERA	5
BP	GO:0060688	regulation of morphogenesis of a branching structure	5/371	56/18670	0.00502289	0.0848534	0.0731051	AR/ESR1/FGF10/HGF/NTN4	5
BP	GO:0086002	cardiac muscle cell action potential involved in contraction	5/371	56/18670	0.00502289	0.0848534	0.0731051	CACNA1D/CACNA2D1/KCND3/SCN2B/KCNE4	5
BP	GO:0060525	prostate glandular acinus development	4/371	11/18670	4.53335e-05	0.00492322	0.00424158	ESR1/FOXA1/TP63/HOXB13	4
BP	GO:0060742	epithelial cell differentiation involved in prostate gland development	4/371	12/18670	6.69354e-05	0.0066953	0.00576831	AR/FOXA1/TP63/HOXB13	4
BP	GO:0090197	positive regulation of chemokine secretion	4/371	15/18670	0.000176054	0.0131212	0.0113045	ALOX15B/IL1RL1/POSTN/IL33	4
BP	GO:0002070	epithelial cell maturation	4/371	16/18670	0.000231072	0.0143984	0.0124049	FOXA1/PGR/SIX3/HOXB13	4
BP	GO:0060749	mammary gland alveolus development	4/371	18/18670	0.000376476	0.0193376	0.0166603	AR/AREG/ERBB4/ESR1	4
BP	GO:0061377	mammary gland lobule development	4/371	18/18670	0.000376476	0.0193376	0.0166603	AR/AREG/ERBB4/ESR1	4
BP	GO:0090196	regulation of chemokine secretion	4/371	18/18670	0.000376476	0.0193376	0.0166603	ALOX15B/IL1RL1/POSTN/IL33	4
BP	GO:0060602	branch elongation of an epithelium	4/371	20/18670	0.000577653	0.0241281	0.0207875	AREG/ESR1/FGF10/TNC	4
BP	GO:0090195	chemokine secretion	4/371	20/18670	0.000577653	0.0241281	0.0207875	ALOX15B/IL1RL1/POSTN/IL33	4
BP	GO:0060487	lung epithelial cell differentiation	4/371	22/18670	0.000845208	0.0295821	0.0254864	FGF10/FOXA1/AGR2/SPDEF	4
BP	GO:0060445	branching involved in salivary gland morphogenesis	4/371	23/18670	0.00100724	0.0319043	0.027487	FGF10/HGF/SEMA3C/NTN4	4
BP	GO:0060479	lung cell differentiation	4/371	23/18670	0.00100724	0.0319043	0.027487	FGF10/FOXA1/AGR2/SPDEF	4
BP	GO:0050901	leukocyte tethering or rolling	4/371	25/18670	0.00139456	0.0394775	0.0340117	CX3CR1/LEP/CCL21/SELP	4
BP	GO:0060444	branching involved in mammary gland duct morphogenesis	4/371	25/18670	0.00139456	0.0394775	0.0340117	AR/AREG/ESR1/PGR	4
BP	GO:0048843	negative regulation of axon extension involved in axon guidance	4/371	26/18670	0.00162255	0.0419544	0.0361457	SEMA5A/SEMA3E/SEMA3C/SEMA3D	4
BP	GO:0048799	animal organ maturation	4/371	27/18670	0.0018752	0.0467703	0.0402948	IGF1/LEP/ALDH1A2/FAT4	4
BP	GO:0085029	extracellular matrix assembly	4/371	28/18670	0.00215383	0.0500628	0.0431314	MFAP4/MYH11/TNXB/THSD4	4
BP	GO:0035025	positive regulation of Rho protein signal transduction	4/371	29/18670	0.00245976	0.0537015	0.0462663	COL3A1/F2RL2/P2RY10/GPR174	4
BP	GO:0090022	regulation of neutrophil chemotaxis	4/371	30/18670	0.00279427	0.0577705	0.0497719	CCL19/CCL21/THBS4/SLIT2	4
BP	GO:0002675	positive regulation of acute inflammatory response	4/371	31/18670	0.00315863	0.0631891	0.0544404	IL6ST/PIK3CG/PTGER3/OSMR	4
BP	GO:0048841	regulation of axon extension involved in axon guidance	4/371	32/18670	0.00355408	0.0693015	0.0597064	SEMA5A/SEMA3E/SEMA3C/SEMA3D	4
BP	GO:0010039	response to iron ion	4/371	33/18670	0.00398185	0.0742496	0.0639694	ABAT/TFF1/SLC40A1/CYBRD1	4
BP	GO:0016486	peptide hormone processing	4/371	33/18670	0.00398185	0.0742496	0.0639694	CES1/CPA3/CTSG/PCSK1N	4
BP	GO:0019934	cGMP-mediated signaling	4/371	33/18670	0.00398185	0.0742496	0.0639694	CD36/HTR2B/PDE3A/PRKG1	4
BP	GO:0007435	salivary gland morphogenesis	4/371	34/18670	0.00444313	0.0774695	0.0667435	FGF10/HGF/SEMA3C/NTN4	4
BP	GO:0035137	hindlimb morphogenesis	4/371	36/18670	0.00547086	0.0896325	0.0772226	AFF3/TFAP2B/ZBTB16/TP63	4
BP	GO:0060428	lung epithelium development	4/371	36/18670	0.00547086	0.0896325	0.0772226	FGF10/FOXA1/AGR2/SPDEF	4
BP	GO:1902622	regulation of neutrophil migration	4/371	36/18670	0.00547086	0.0896325	0.0772226	CCL19/CCL21/THBS4/SLIT2	4
BP	GO:0007431	salivary gland development	4/371	37/18670	0.00603955	0.0947101	0.0815971	FGF10/HGF/SEMA3C/NTN4	4
BP	GO:0086010	membrane depolarization during action potential	4/371	37/18670	0.00603955	0.0947101	0.0815971	CACNA1D/CACNA2D1/SCN2B/SCN7A	4
BP	GO:1902742	apoptotic process involved in development	4/371	38/18670	0.00664623	0.0997765	0.0859621	NKX2-5/SIX3/SLIT3/SLIT2	4
BP	GO:0060513	prostatic bud formation	3/371	10/18670	0.000841914	0.0295821	0.0254864	AR/FGF10/TP63	3
BP	GO:0060600	dichotomous subdivision of an epithelial terminal unit	3/371	10/18670	0.000841914	0.0295821	0.0254864	AREG/FOXD1/SEMA3C	3
BP	GO:0061140	lung secretory cell differentiation	3/371	10/18670	0.000841914	0.0295821	0.0254864	FGF10/AGR2/SPDEF	3
BP	GO:0033148	positive regulation of intracellular estrogen receptor signaling pathway	3/371	11/18670	0.00114063	0.034964	0.0301231	AR/FOXA1/SRARP	3
BP	GO:0002002	regulation of angiotensin levels in blood	3/371	12/18670	0.00149853	0.0396158	0.0341309	CES1/CPA3/CTSG	3
BP	GO:0002003	angiotensin maturation	3/371	12/18670	0.00149853	0.0396158	0.0341309	CES1/CPA3/CTSG	3
BP	GO:0042340	keratan sulfate catabolic process	3/371	12/18670	0.00149853	0.0396158	0.0341309	OMD/OGN/KERA	3
BP	GO:2001223	negative regulation of neuron migration	3/371	12/18670	0.00149853	0.0396158	0.0341309	COL3A1/ERBB4/TNN	3
BP	GO:0010838	positive regulation of keratinocyte proliferation	3/371	13/18670	0.00191954	0.0467703	0.0402948	AREG/FGF10/TP63	3
BP	GO:0043116	negative regulation of vascular permeability	3/371	13/18670	0.00191954	0.0467703	0.0402948	PDE3A/SLIT2/AKAP12	3
BP	GO:0060601	lateral sprouting from an epithelium	3/371	13/18670	0.00191954	0.0467703	0.0402948	AR/FGF10/TP63	3
BP	GO:0035112	genitalia morphogenesis	3/371	14/18670	0.00240728	0.0531981	0.0458326	AR/FGF10/TP63	3
BP	GO:0006837	serotonin transport	3/371	16/18670	0.00359601	0.0693829	0.0597766	MAOB/SLC6A4/SLC18A2	3
BP	GO:0060572	morphogenesis of an epithelial bud	3/371	16/18670	0.00359601	0.0693829	0.0597766	AR/FGF10/TP63	3
BP	GO:0030540	female genitalia development	3/371	17/18670	0.00430284	0.0760703	0.0655381	ESR1/FGF10/TP63	3
BP	GO:0033145	positive regulation of intracellular steroid hormone receptor signaling pathway	3/371	17/18670	0.00430284	0.0760703	0.0655381	AR/FOXA1/SRARP	3
BP	GO:0098856	intestinal lipid absorption	3/371	17/18670	0.00430284	0.0760703	0.0655381	CD36/LEP/UGCG	3
BP	GO:0001991	regulation of systemic arterial blood pressure by circulatory renin-angiotensin	3/371	19/18670	0.00595412	0.0947101	0.0815971	CES1/CPA3/CTSG	3
BP	GO:0034755	iron ion transmembrane transport	3/371	19/18670	0.00595412	0.0947101	0.0815971	SLC40A1/TTYH1/SCARA5	3

## Sheet: GO_CC
ONTOLOGY	ID	Description	GeneRatio	BgRatio	pvalue	p.adjust	qvalue	geneID	Count
CC	GO:0062023	collagen-containing extracellular matrix	49/377	406/19717	3.55158e-25	1.15782e-22	9.7575e-23	COL3A1/COL4A6/COL8A1/COL10A1/COL11A2/COL17A1/CPA3/VCAN/CTSG/DCN/DPT/ECM2/F7/F13A1/FBN1/FGF10/HPX/TNC/LAMA2/MFAP4/OMD/OGN/SFRP2/THBS4/TNXB/TPSAB1/COL14A1/CILP/ADIPOQ/ADAMTS2/EDIL3/PRG4/SPON1/POSTN/MMRN1/MXRA5/ABI3BP/ASPN/NTN4/TPSB2/THSD4/HMCN1/PODN/LRRC15/COL6A6/CCDC80/FREM1/ADAMTS15/VWA2	49
CC	GO:0098793	presynapse	23/377	491/19717	7.91136e-05	0.00274501	0.00231336	AMPH/CACNA1D/CNTN1/DDC/ERBB4/KCNH1/ROR1/PCDH8/RAB27B/SLC6A4/SLC18A2/DOC2B/ADAM23/CHRNA6/TNIK/FLRT3/SLC40A1/SYT17/NLGN4X/TNN/MCTP1/CTTNBP2/SYT9	23
CC	GO:0045177	apical part of cell	19/377	384/19717	0.000164192	0.00446054	0.00375912	CD36/SLC26A3/F2RL2/CEACAM6/DDR2/ABCB1/RAB27B/SLC1A1/ITGA8/OSMR/CHL1/TNIK/KCNE4/RAPGEF6/FAT4/SLC44A4/ECRG4/PARD3B/CD300LG	19
CC	GO:0005788	endoplasmic reticulum lumen	17/377	309/19717	0.000102603	0.00304078	0.00256262	C4A/CES1/COL3A1/COL4A6/COL8A1/COL10A1/COL11A2/COL17A1/VCAN/F7/FBN1/TNC/COL14A1/VGF/MSLN/SPON1/CHRDL1	17
CC	GO:0097060	synaptic membrane	17/377	432/19717	0.00418323	0.0470253	0.0396306	CACNA1D/CNTN1/ERBB4/KCND3/KCNH1/PCDH8/SLC6A4/ITGA8/ADAM23/CHRNA6/FLRT3/TENM2/NLGN4X/LRRC4C/CLSTN2/SHISA6/SHISA9	17
CC	GO:0016324	apical plasma membrane	16/377	318/19717	0.000442509	0.0103041	0.00868383	CD36/SLC26A3/F2RL2/CEACAM6/DDR2/ABCB1/RAB27B/SLC1A1/OSMR/TNIK/KCNE4/RAPGEF6/SLC44A4/ECRG4/PARD3B/CD300LG	16
CC	GO:0030133	transport vesicle	15/377	392/19717	0.00883089	0.0846727	0.071358	AMPH/AREG/CPA3/DDC/IGF1/RAB27B/SLC18A2/VGF/SLC40A1/SYT17/MCTP1/CTTNBP2/IL33/GALNT15/SYT9	15
CC	GO:0034702	ion channel complex	14/377	301/19717	0.00207386	0.035583	0.0299876	CACNA1D/CACNA2D1/KCND3/KCNH1/SCN2B/SCN7A/ABCC8/CHRNA6/KCNE4/CNTNAP2/CLIC6/TTYH1/SHISA6/SHISA9	14
CC	GO:0045211	postsynaptic membrane	14/377	323/19717	0.00391132	0.0467935	0.0394353	CNTN1/ERBB4/KCND3/KCNH1/PCDH8/SLC6A4/CHRNA6/FLRT3/TENM2/NLGN4X/LRRC4C/CLSTN2/SHISA6/SHISA9	14
CC	GO:1902495	transmembrane transporter complex	14/377	324/19717	0.00401907	0.0467935	0.0394353	CACNA1D/CACNA2D1/KCND3/KCNH1/SCN2B/SCN7A/ABCC8/CHRNA6/KCNE4/CNTNAP2/CLIC6/TTYH1/SHISA6/SHISA9	14
CC	GO:1990351	transporter complex	14/377	332/19717	0.00497097	0.0506418	0.0426784	CACNA1D/CACNA2D1/KCND3/KCNH1/SCN2B/SCN7A/ABCC8/CHRNA6/KCNE4/CNTNAP2/CLIC6/TTYH1/SHISA6/SHISA9	14
CC	GO:0099240	intrinsic component of synaptic membrane	13/377	164/19717	1.68625e-05	0.00109944	0.000926552	CACNA1D/CNTN1/ERBB4/KCND3/PCDH8/SLC6A4/ADAM23/CHRNA6/FLRT3/LRRC4C/CLSTN2/SHISA6/SHISA9	13
CC	GO:0005604	basement membrane	12/377	95/19717	2.6319e-07	2.85999e-05	2.41026e-05	COL4A6/COL8A1/COL17A1/FBN1/TNC/LAMA2/THBS4/NTN4/HMCN1/CCDC80/FREM1/VWA2	12
CC	GO:0099699	integral component of synaptic membrane	12/377	152/19717	3.69303e-05	0.00171989	0.00144944	CACNA1D/ERBB4/KCND3/PCDH8/SLC6A4/ADAM23/CHRNA6/FLRT3/LRRC4C/CLSTN2/SHISA6/SHISA9	12
CC	GO:0005581	collagen trimer	11/377	87/19717	8.24103e-07	6.71644e-05	5.66029e-05	COL3A1/COL4A6/COL8A1/COL10A1/COL11A2/COL17A1/DCN/COL14A1/ADIPOQ/C1QTNF7/COL6A6	11
CC	GO:0098936	intrinsic component of postsynaptic membrane	11/377	122/19717	2.27543e-05	0.00123631	0.00104191	CNTN1/ERBB4/KCND3/PCDH8/SLC6A4/CHRNA6/FLRT3/LRRC4C/CLSTN2/SHISA6/SHISA9	11
CC	GO:0034703	cation channel complex	11/377	220/19717	0.00351871	0.0463858	0.0390917	CACNA1D/CACNA2D1/KCND3/KCNH1/SCN2B/SCN7A/ABCC8/KCNE4/CNTNAP2/SHISA6/SHISA9	11
CC	GO:0044420	extracellular matrix component	10/377	51/19717	3.68774e-08	6.01102e-06	5.0658e-06	COL3A1/COL4A6/COL8A1/COL11A2/FBN1/TNC/MFAP4/COL14A1/NTN4/THSD4	10
CC	GO:0099055	integral component of postsynaptic membrane	10/377	117/19717	8.42026e-05	0.00274501	0.00231336	ERBB4/KCND3/PCDH8/SLC6A4/CHRNA6/FLRT3/LRRC4C/CLSTN2/SHISA6/SHISA9	10
CC	GO:0031225	anchored component of membrane	10/377	170/19717	0.00164498	0.0327124	0.0275684	ART3/CNTN1/GFRA1/GFRA3/GP2/CEACAM6/RAB27B/LY6D/MSLN/PRND	10
CC	GO:0070382	exocytic vesicle	10/377	207/19717	0.00668391	0.066029	0.055646	AMPH/DDC/IGF1/RAB27B/SLC18A2/SLC40A1/SYT17/MCTP1/CTTNBP2/SYT9	10
CC	GO:0031091	platelet alpha granule	7/377	91/19717	0.00180621	0.0327124	0.0275684	CD36/F13A1/HGF/IGF1/PCDH7/SELP/MMRN1	7
CC	GO:0005796	Golgi lumen	7/377	102/19717	0.00344923	0.0463858	0.0390917	VCAN/DCN/F7/OMD/OGN/KERA/MUCL1	7
CC	GO:0099060	integral component of postsynaptic specialization membrane	6/377	74/19717	0.00291501	0.0452521	0.0381363	ERBB4/KCND3/LRRC4C/CLSTN2/SHISA6/SHISA9	6
CC	GO:0098948	intrinsic component of postsynaptic specialization membrane	6/377	77/19717	0.00355719	0.0463858	0.0390917	ERBB4/KCND3/LRRC4C/CLSTN2/SHISA6/SHISA9	6
CC	GO:0098889	intrinsic component of presynaptic membrane	6/377	82/19717	0.00485314	0.0506418	0.0426784	CACNA1D/CNTN1/ERBB4/SLC6A4/ADAM23/CHRNA6	6
CC	GO:0099061	integral component of postsynaptic density membrane	5/377	50/19717	0.00260283	0.0424261	0.0357547	ERBB4/LRRC4C/CLSTN2/SHISA6/SHISA9	5
CC	GO:0099146	intrinsic component of postsynaptic density membrane	5/377	53/19717	0.00336493	0.0463858	0.0390917	ERBB4/LRRC4C/CLSTN2/SHISA6/SHISA9	5
CC	GO:0032589	neuron projection membrane	5/377	57/19717	0.00461467	0.0501461	0.0422607	MAPT/ITGA8/CNTNAP2/SHISA6/SHISA9	5
CC	GO:0005614	interstitial matrix	4/377	12/19717	5.76666e-05	0.00234992	0.00198039	ECM2/TNC/ABI3BP/CCDC80	4
CC	GO:0098644	complex of collagen trimers	4/377	19/19717	0.000406113	0.0101841	0.00858263	COL3A1/COL4A6/COL8A1/COL11A2	4
CC	GO:0001527	microfibril	3/377	10/19717	0.00075308	0.0163669	0.0137933	FBN1/MFAP4/THSD4	3
CC	GO:0032591	dendritic spine membrane	3/377	13/19717	0.00171987	0.0327124	0.0275684	ITGA8/SHISA6/SHISA9	3
CC	GO:0031092	platelet alpha granule membrane	3/377	17/19717	0.00386379	0.0467935	0.0394353	CD36/PCDH7/SELP	3

## Sheet: GO_MF
ONTOLOGY	ID	Description	GeneRatio	BgRatio	pvalue	p.adjust	qvalue	geneID	Count
MF	GO:0005201	extracellular matrix structural constituent	30/350	163/17697	1.05248e-20	6.02016e-18	5.26238e-18	COL3A1/COL4A6/COL8A1/COL10A1/COL11A2/COL17A1/VCAN/DCN/DPT/FBN1/TNC/LAMA2/MFAP4/OGN/TNXB/COL14A1/CILP/ADIPOQ/EDIL3/PRG4/SPON1/POSTN/MMRN1/MXRA5/ABI3BP/ASPN/THSD4/HMCN1/PODN/COL6A6	30
MF	GO:0048018	receptor ligand activity	25/350	482/17697	1.21035e-05	0.000883029	0.000771879	AREG/FBN1/FGF10/HGF/IGF1/LEP/MAPT/OGN/TNFRSF11B/CCL14/CCL19/CCL21/SFRP2/TFF1/THBS4/VGF/SEMA5A/ADIPOQ/SEMA3E/SEMA3C/FLRT3/FLRT2/GREM2/IL33/SEMA3D	25
MF	GO:0005539	glycosaminoglycan binding	20/350	229/17697	3.14599e-08	8.99754e-06	7.86498e-06	VCAN/CTSG/DCN/ECM2/FBN1/FGF10/HABP2/JCHAIN/SELP/SLIT3/THBS4/TNXB/CCN4/SEMA5A/SLIT2/POSTN/ABI3BP/GREM2/CCDC80/ADAMTS15	20
MF	GO:0004175	endopeptidase activity	18/350	427/17697	0.00221458	0.0970001	0.0847903	CTSG/F7/HABP2/HGF/MMP3/PIP/TLL1/TPSAB1/ADAM23/ADAMTS2/KLK4/TPSB2/ADAMTS12/DDI2/CAPN13/ADAMTS15/ADAMTS16/CAPN8	18
MF	GO:1901681	sulfur compound binding	16/350	250/17697	4.03116e-05	0.00256203	0.00223954	CTSG/ECM2/FBN1/FGF10/SELP/SLIT3/THBS4/TNXB/CCN4/SEMA5A/SLIT2/POSTN/ABI3BP/GREM2/CCDC80/ADAMTS15	16
MF	GO:0008201	heparin binding	15/350	169/17697	1.38261e-06	0.000197713	0.000172826	CTSG/ECM2/FBN1/FGF10/SELP/SLIT3/THBS4/TNXB/CCN4/SLIT2/POSTN/ABI3BP/GREM2/CCDC80/ADAMTS15	15
MF	GO:0005178	integrin binding	12/350	132/17697	1.23501e-05	0.000883029	0.000771879	COL3A1/ECM2/FBN1/IGF1/SFRP2/THBS4/TNXB/ADAM23/CCN4/ITGBL1/EDIL3/TNN	12
MF	GO:0030020	extracellular matrix structural constituent conferring tensile strength	8/350	41/17697	1.16821e-06	0.000197713	0.000172826	COL3A1/COL4A6/COL8A1/COL10A1/COL11A2/COL17A1/COL14A1/COL6A6	8
MF	GO:0005518	collagen binding	8/350	67/17697	5.10047e-05	0.00291747	0.00255023	DCN/ECM2/DDR2/COL14A1/ABI3BP/ASPN/PODN/LRRC15	8
MF	GO:0030021	extracellular matrix structural constituent conferring compression resistance	6/350	22/17697	3.27314e-06	0.000374447	0.000327314	VCAN/DCN/OGN/PRG4/ASPN/PODN	6
MF	GO:0045499	chemorepellent activity	6/350	27/17697	1.19445e-05	0.000883029	0.000771879	SEMA5A/SEMA3E/SEMA3C/FLRT3/FLRT2/SEMA3D	6
MF	GO:0019865	immunoglobulin binding	5/350	24/17697	9.17053e-05	0.00476868	0.00416842	MS4A1/FCER1A/MS4A2/JCHAIN/PIP	5
MF	GO:0030215	semaphorin receptor binding	4/350	23/17697	0.000988936	0.0471393	0.0412057	SEMA5A/SEMA3E/SEMA3C/SEMA3D	4
MF	GO:0070330	aromatase activity	3/350	14/17697	0.00237413	0.0970001	0.0847903	CYP4B1/CYP4Z1/CYP4X1	3

## Sheet: KEGG
ONTOLOGY	ID	Description	GeneRatio	BgRatio	pvalue	p.adjust	qvalue	geneID	Count
KEGG	hsa04151	PI3K-Akt signaling pathway	18/173	354/8076	0.000553712	0.0208565	0.0196228	AREG/COL4A6/ERBB4/FGF10/HGF/TNC/IGF1/IL7R/LAMA2/PCK1/PIK3CG/RELN/THBS4/TNXB/ITGA8/OSMR/TNN/COL6A6	18
KEGG	hsa04360	Axon guidance	13/173	181/8076	0.000129153	0.00972952	0.00915399	BMPR1B/EPHA3/NFATC2/SLIT3/UNC5C/SEMA5A/SLIT2/SEMA3E/PLXNC1/SEMA3C/LRRC4C/NTN4/SEMA3D	13
KEGG	hsa04512	ECM-receptor interaction	11/173	88/8076	2.43081e-06	0.000549364	0.000516867	CD36/COL4A6/TNC/LAMA2/RELN/THBS4/TNXB/ITGA8/TNN/COL6A6/FREM1	11
KEGG	hsa04510	Focal adhesion	11/173	201/8076	0.00386797	0.0871524	0.0819972	COL4A6/HGF/TNC/IGF1/LAMA2/RELN/THBS4/TNXB/ITGA8/TNN/COL6A6	11
KEGG	hsa04974	Protein digestion and absorption	10/173	103/8076	6.63289e-05	0.00749516	0.00705181	COL3A1/COL4A6/COL8A1/COL10A1/COL11A2/COL17A1/CPA3/SLC1A1/COL14A1/COL6A6	10
KEGG	hsa04726	Serotonergic synapse	9/173	115/8076	0.000774732	0.0250128	0.0235332	ADCY5/ALOX15B/CACNA1D/DDC/HTR2B/MAOB/SLC6A4/SLC18A2/CYP4X1	9
KEGG	hsa04514	Cell adhesion molecules	9/173	149/8076	0.00462756	0.0871524	0.0819972	CNTN1/VCAN/NCAM2/SELP/ITGA8/CNTNAP2/NLGN4X/LRRC4C/CLDN19	9
KEGG	hsa03320	PPAR signaling pathway	8/173	78/8076	0.000246624	0.0139343	0.01311	CD36/FABP4/HMGCS2/PCK1/PLIN1/ACOX2/ADIPOQ/PLIN4	8
KEGG	hsa05414	Dilated cardiomyopathy	7/173	96/8076	0.00441068	0.0871524	0.0819972	ADCY5/CACNA1D/CACNA2D1/IGF1/LAMA2/TNNT2/ITGA8	7
KEGG	hsa02010	ABC transporters	6/173	45/8076	0.000360808	0.0163085	0.0153438	ABCB1/ABCC8/ABCA9/ABCA8/ABCA6/ABCC11	6
KEGG	hsa00350	Tyrosine metabolism	5/173	36/8076	0.000936927	0.0264682	0.0249025	ADH1B/AOX1/DDC/HGD/MAOB	5
KEGG	hsa05144	Malaria	5/173	50/8076	0.00413833	0.0871524	0.0819972	CD36/ACKR1/HGF/SELP/THBS4	5
